# Supplementary material for: Design, Synthesis, and Insecticidal Activity of Some Novel Diacylhydrazine and Acylhydrazone Derivatives
Source: PubMed Central journal article supplement (PMC6272438; doi:10.3390/molecules20045625), 2015-03-30
Supplement: molecules-20-05625-s001.pdf [file molecules-20-05625-s001.pdf]

# Supplementary Materials

20131010S1  
20131010S1 1H 20131123

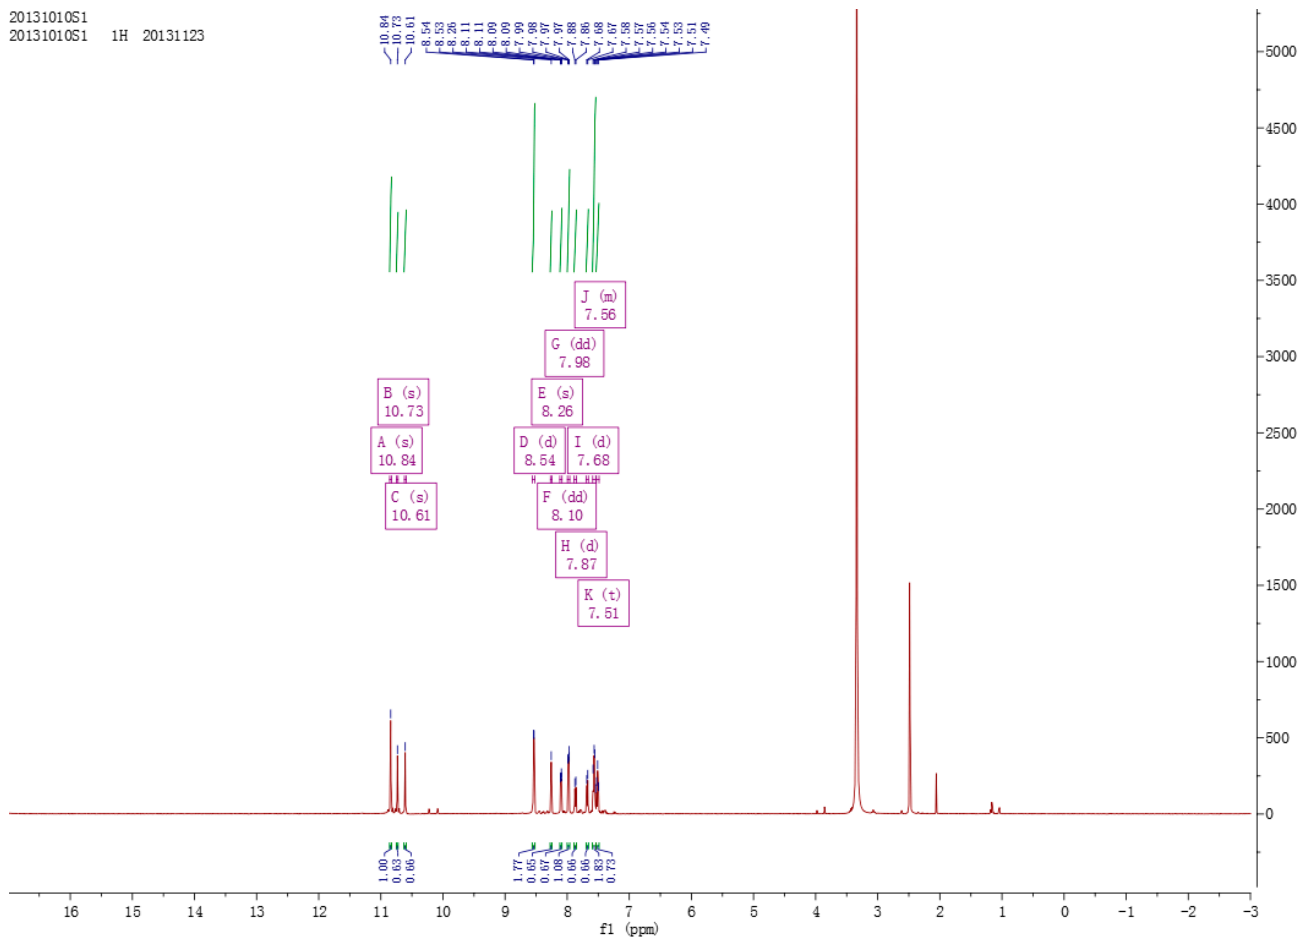

Figure S1.  $^1\text{H-NMR}$  of compound **3a**.

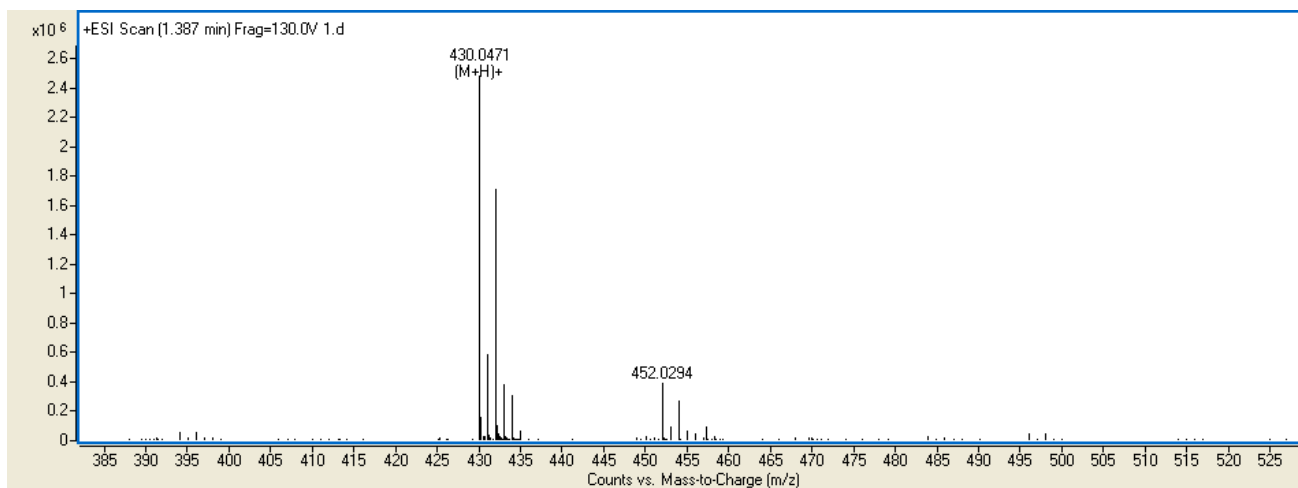

Figure S2. HR-ESI-MS of compound **3a**.

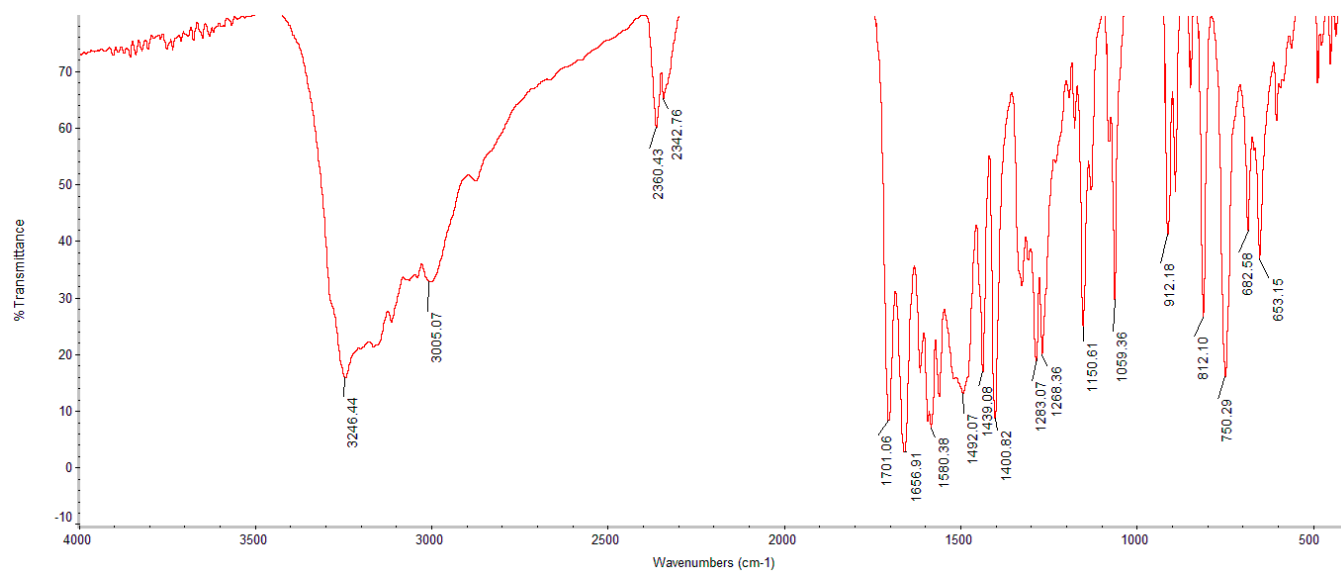

Figure S3. IR of compound 3a.

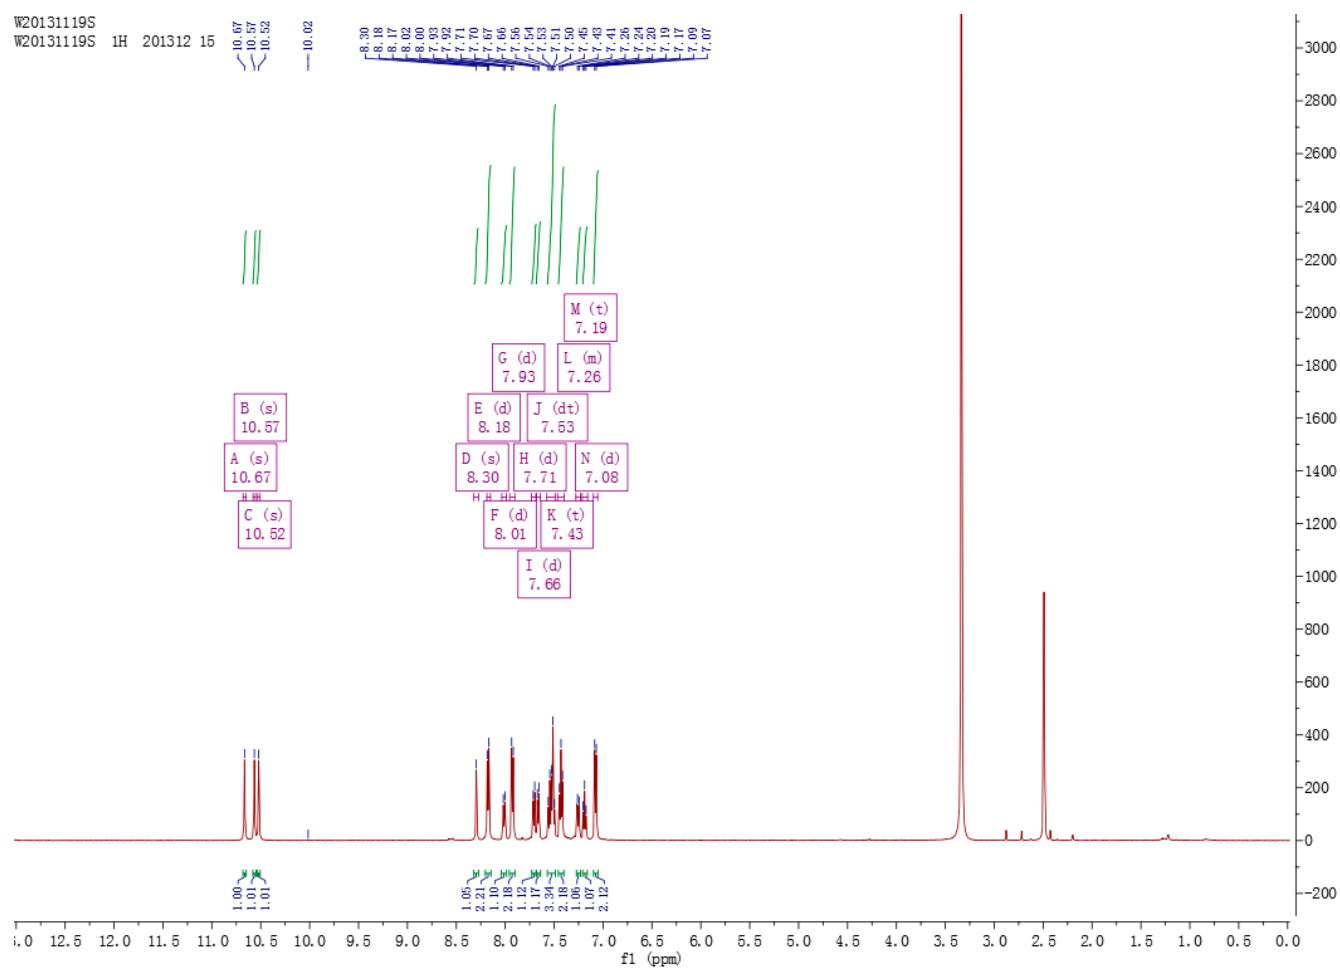

Figure S4. <sup>1</sup>H-NMR of compound 3b.

W20131119S #529 RT: 5.19 AV: 1 NL: 8.66E8  
T: FTMS + p ESI Full ms [100.00-1500.00]

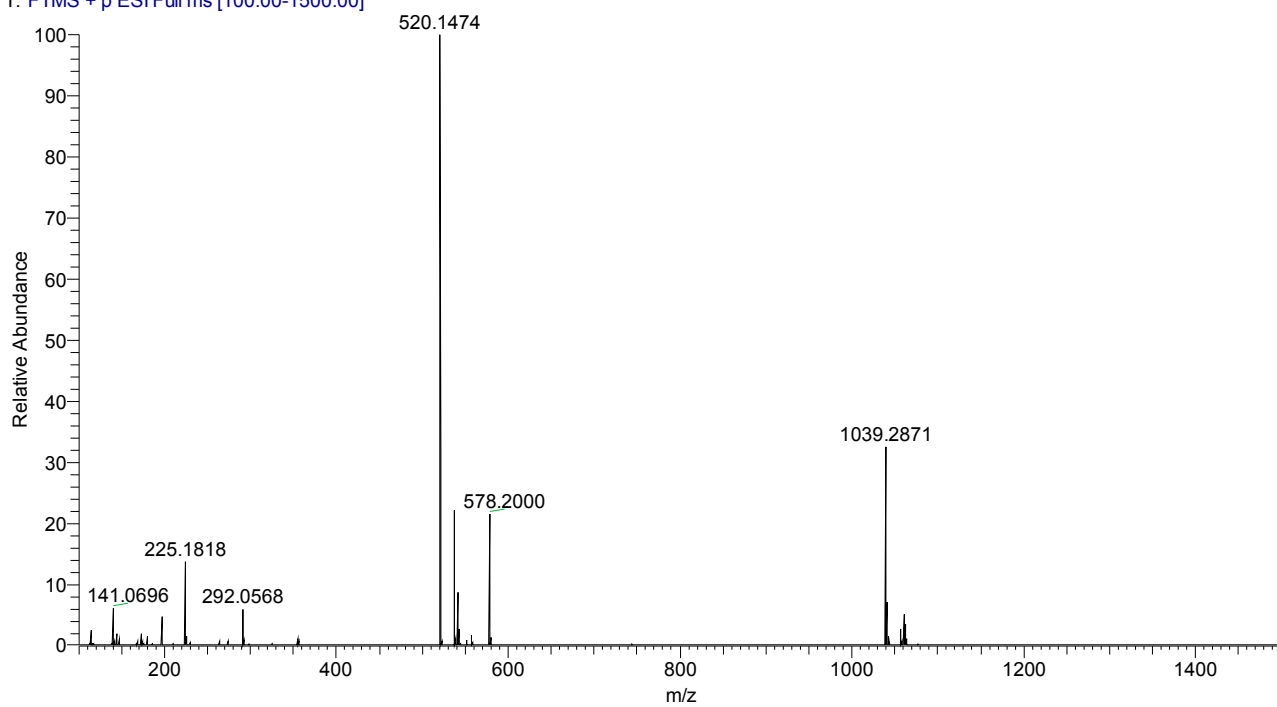

Figure S5. HR-ESI-MS of compound 3b.

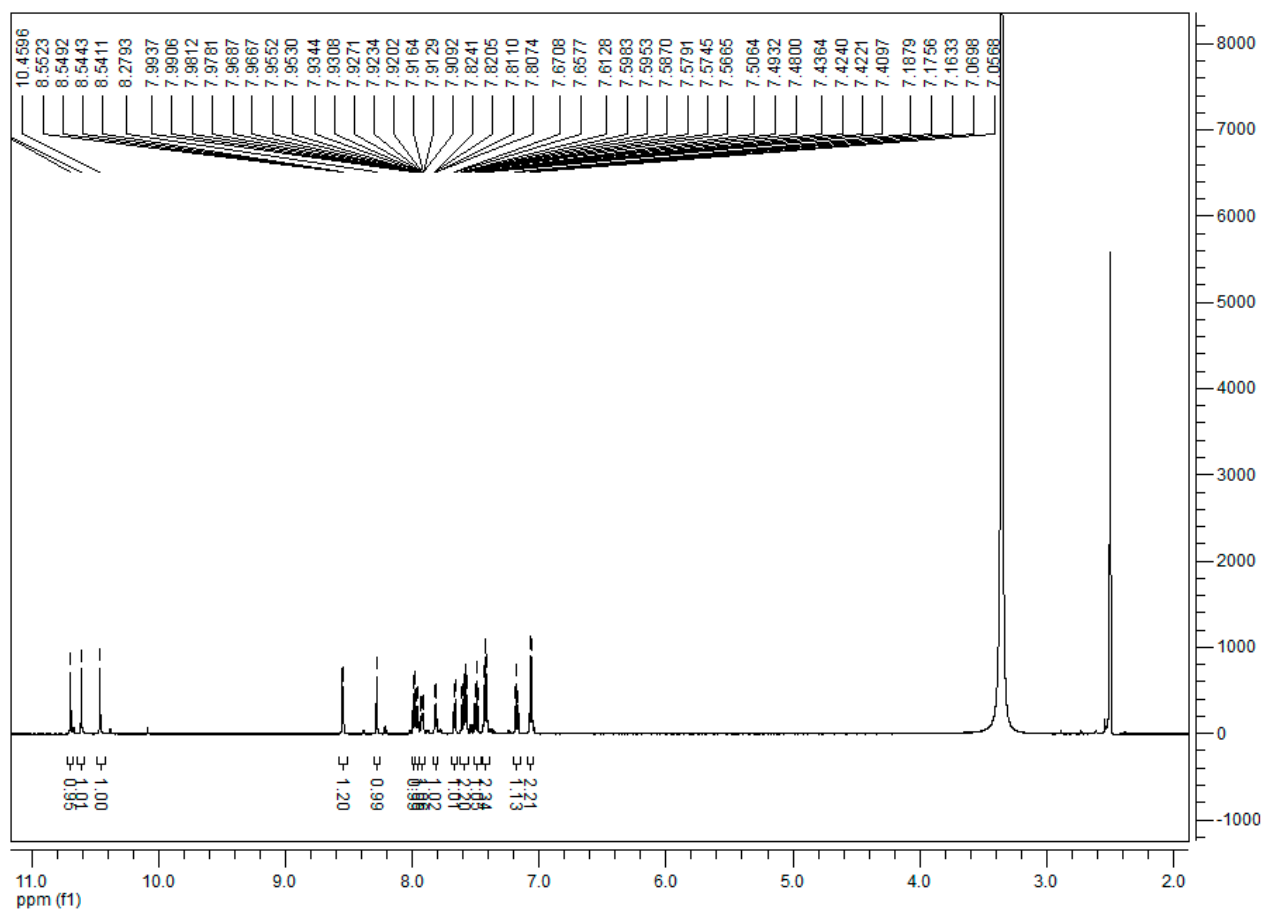

Figure S6.  $^1\text{H-NMR}$  of compound 3c.

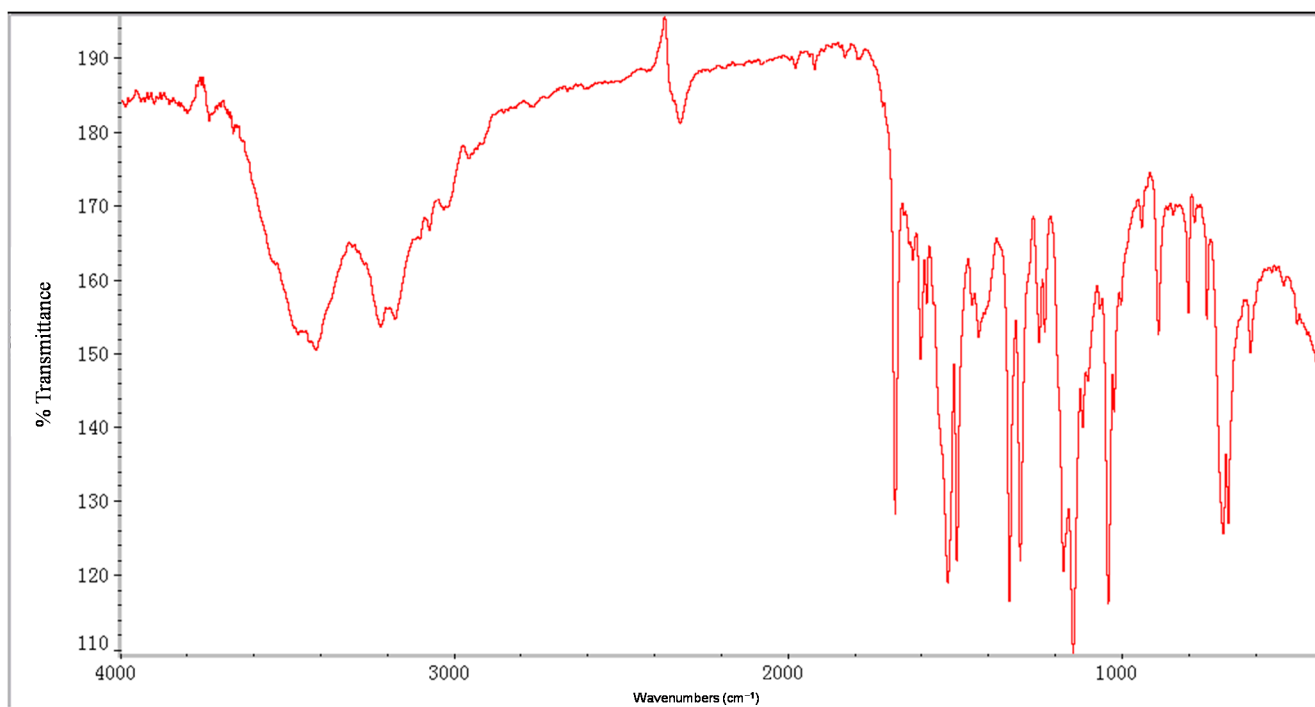

Figure S7. IR of compound 3c.

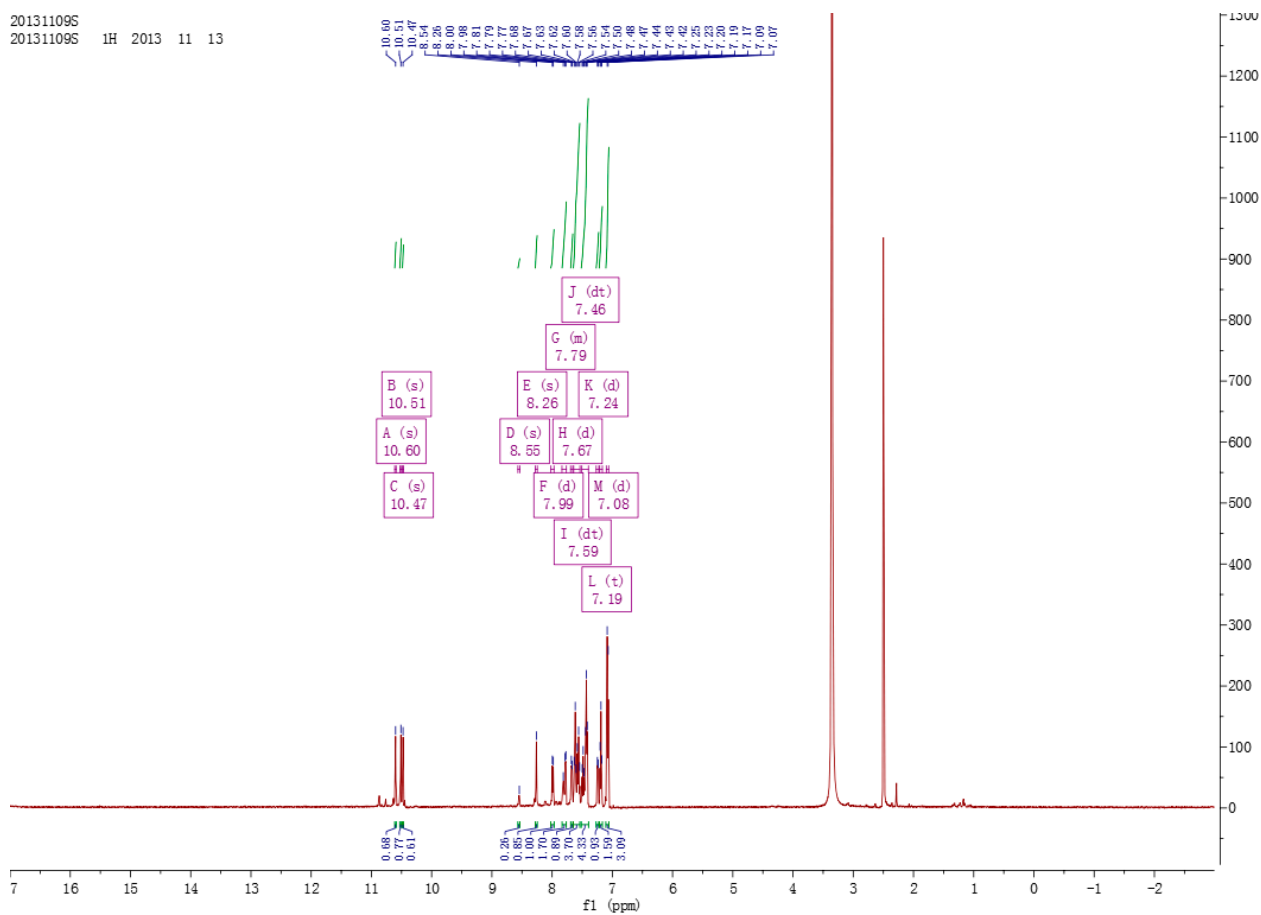Figure S8. <sup>1</sup>H-NMR of compound 3d.

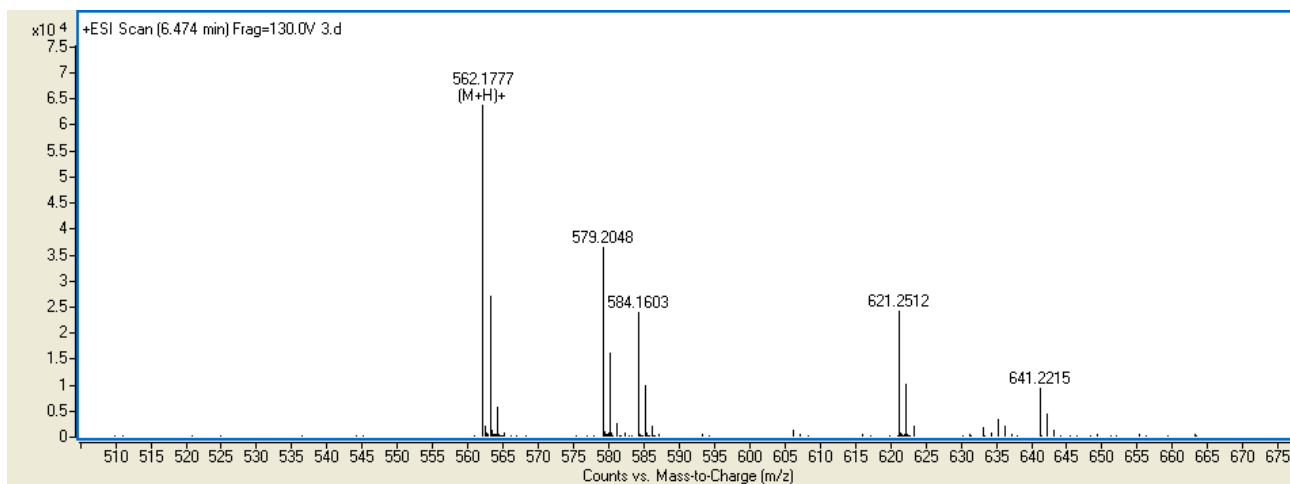

**Figure S9.** HR-ESI-MS of compound **3d**.

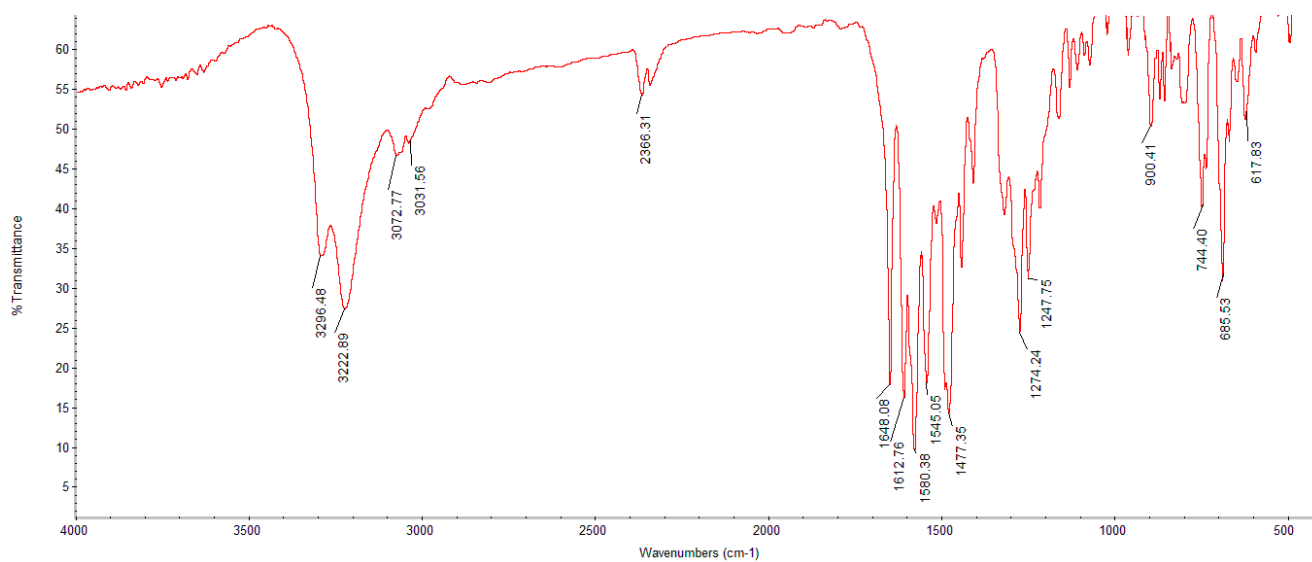

**Figure S10.** IR of compound **3d**.



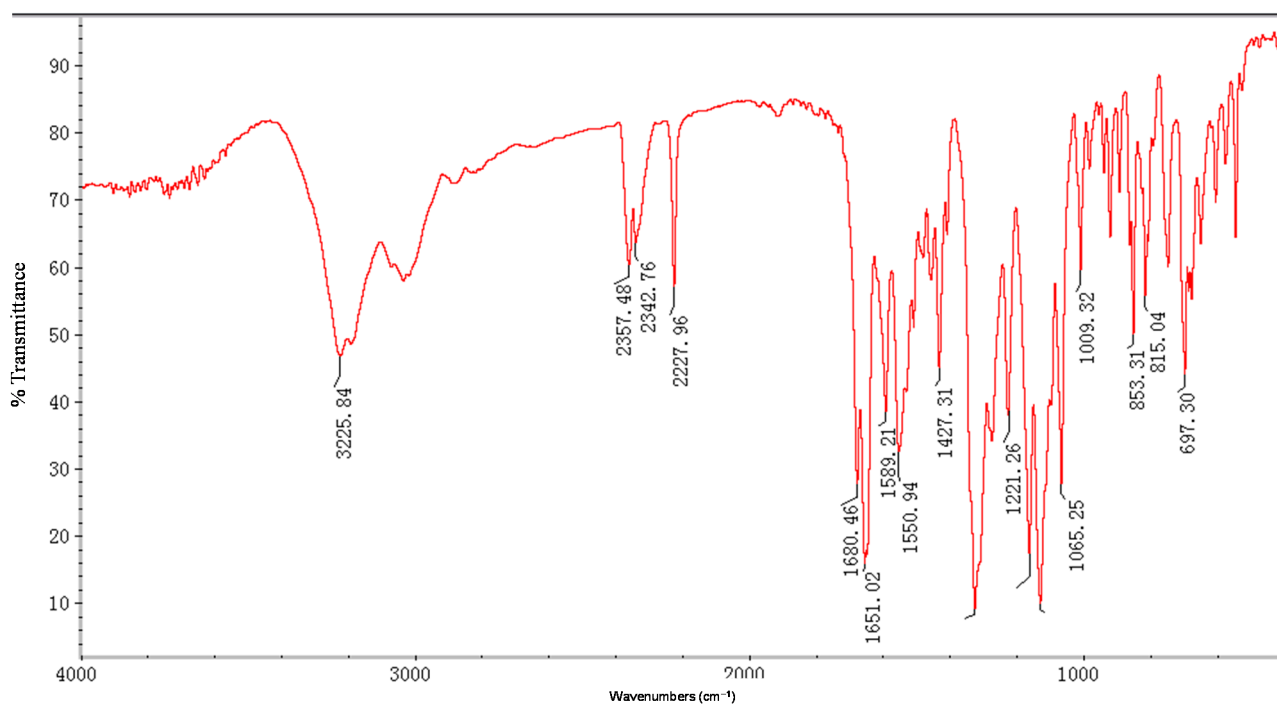

Figure S13. IR spectra of compound 4a.

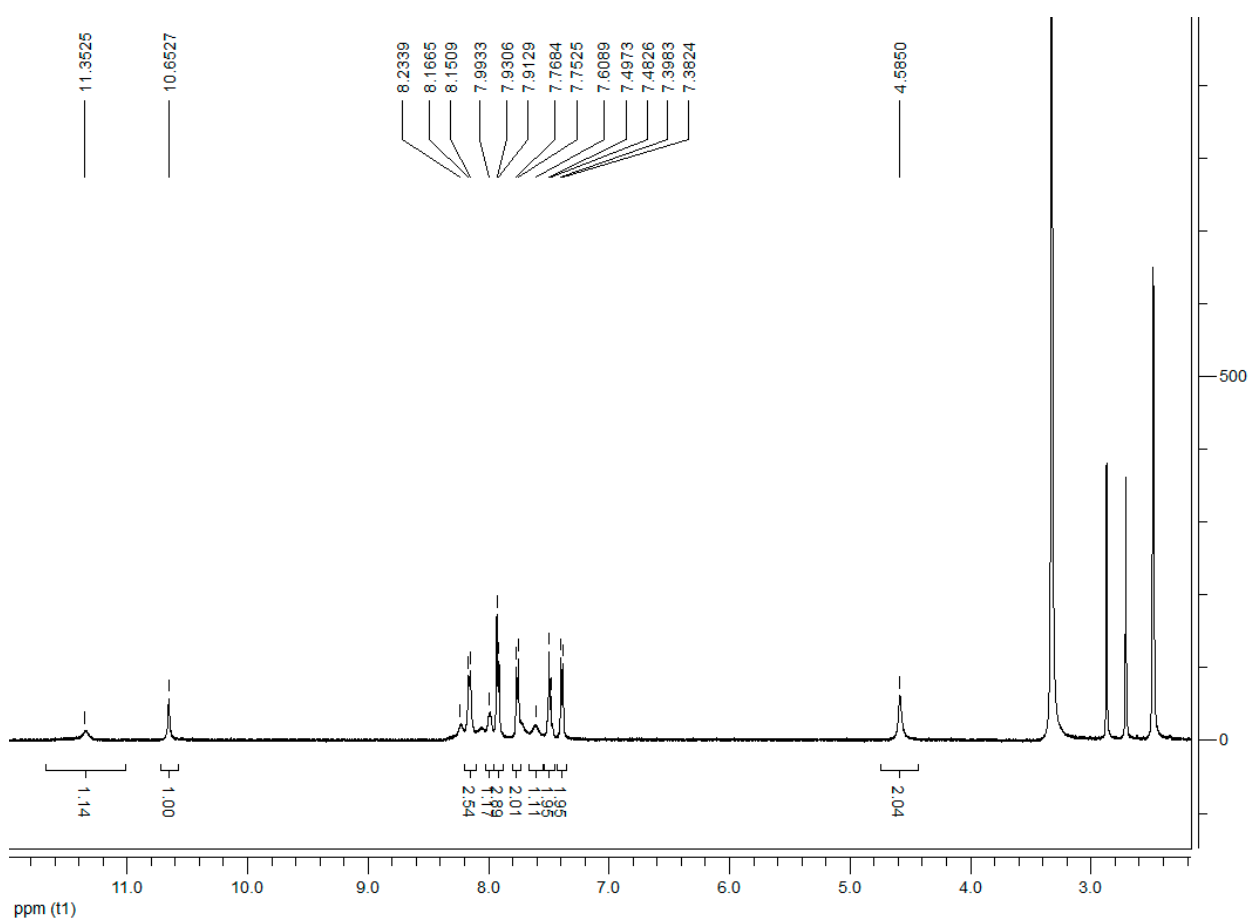

Figure S14. <sup>1</sup>H-NMR spectra of compound 4b.

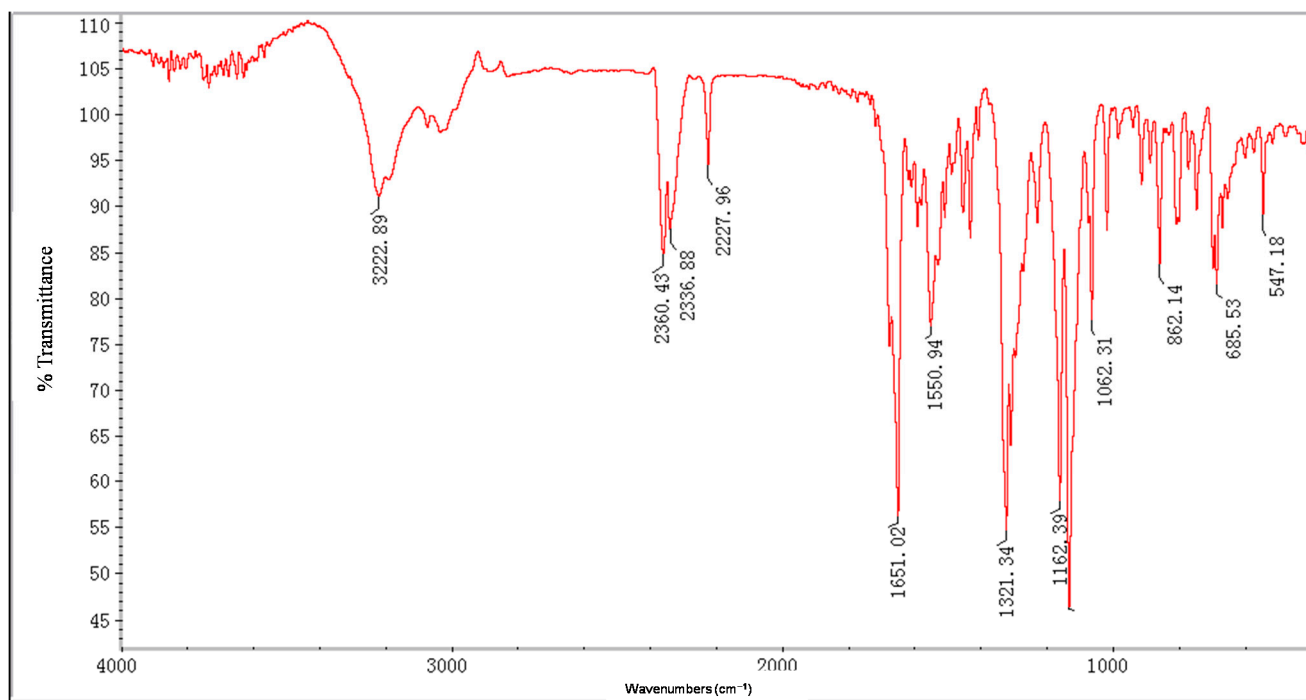

Figure S15. IR spectra of compound 4b.

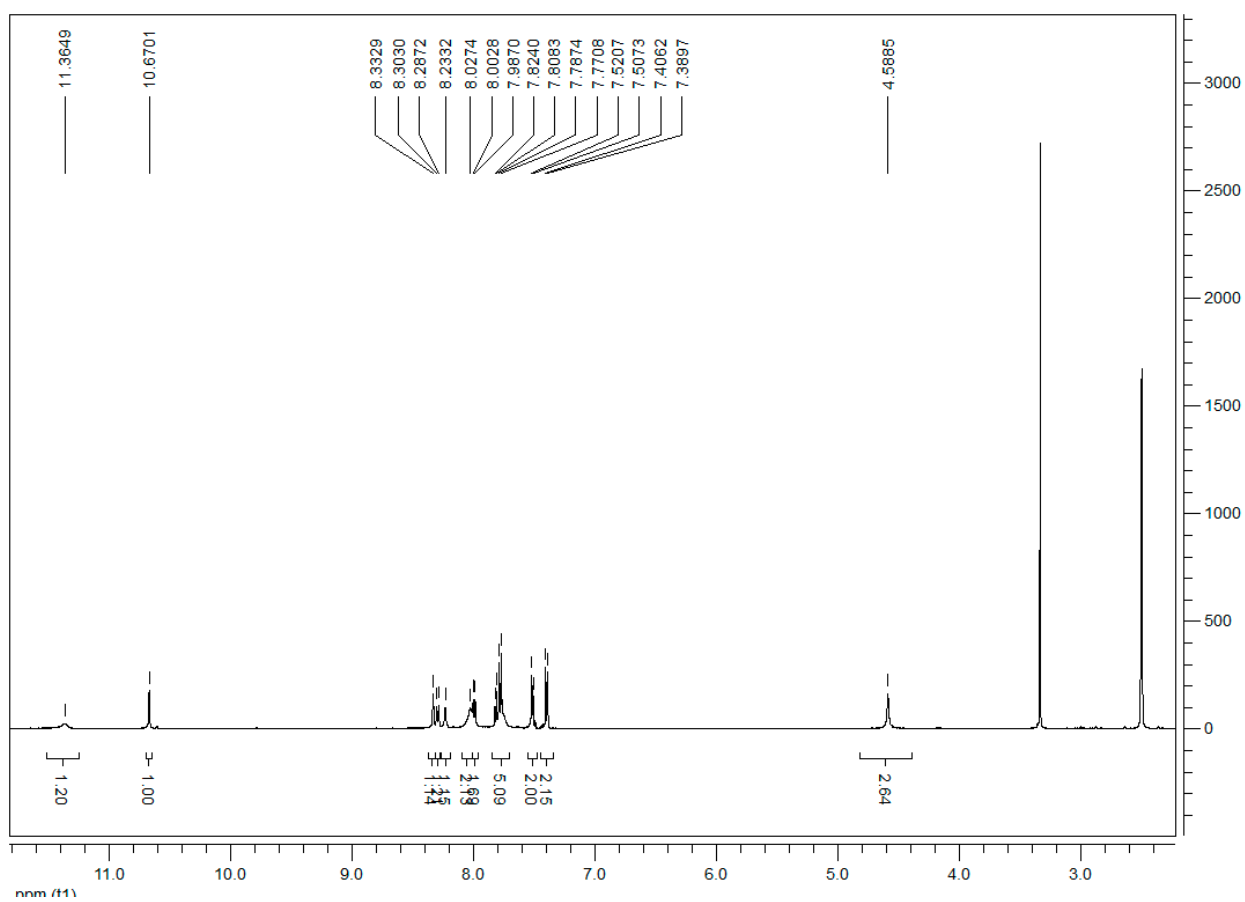

Figure S16. <sup>1</sup>H-NMR spectra of compound 4c.



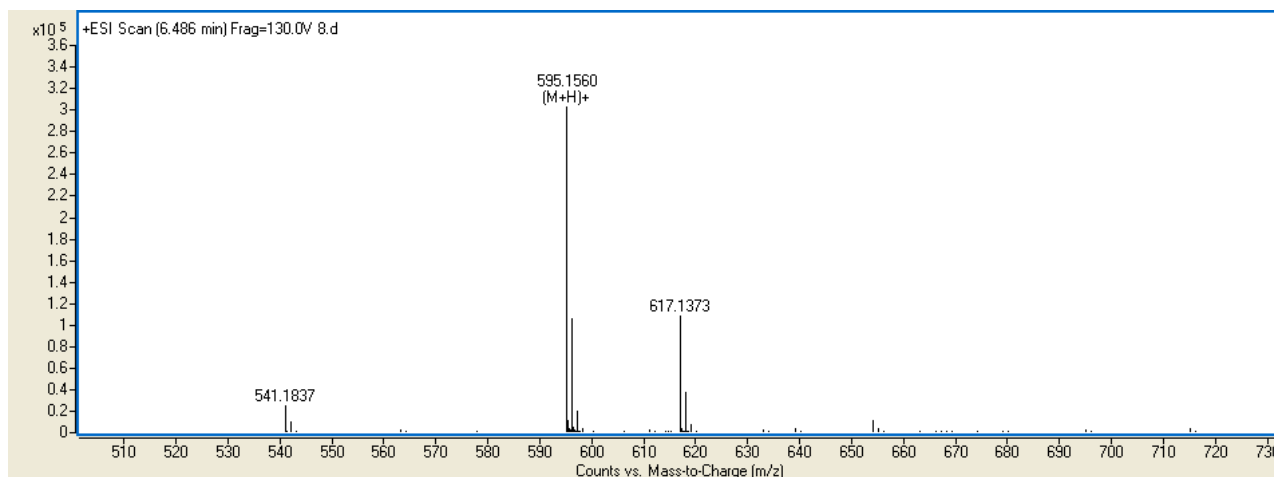

Figure S17. MS of compound 4c.

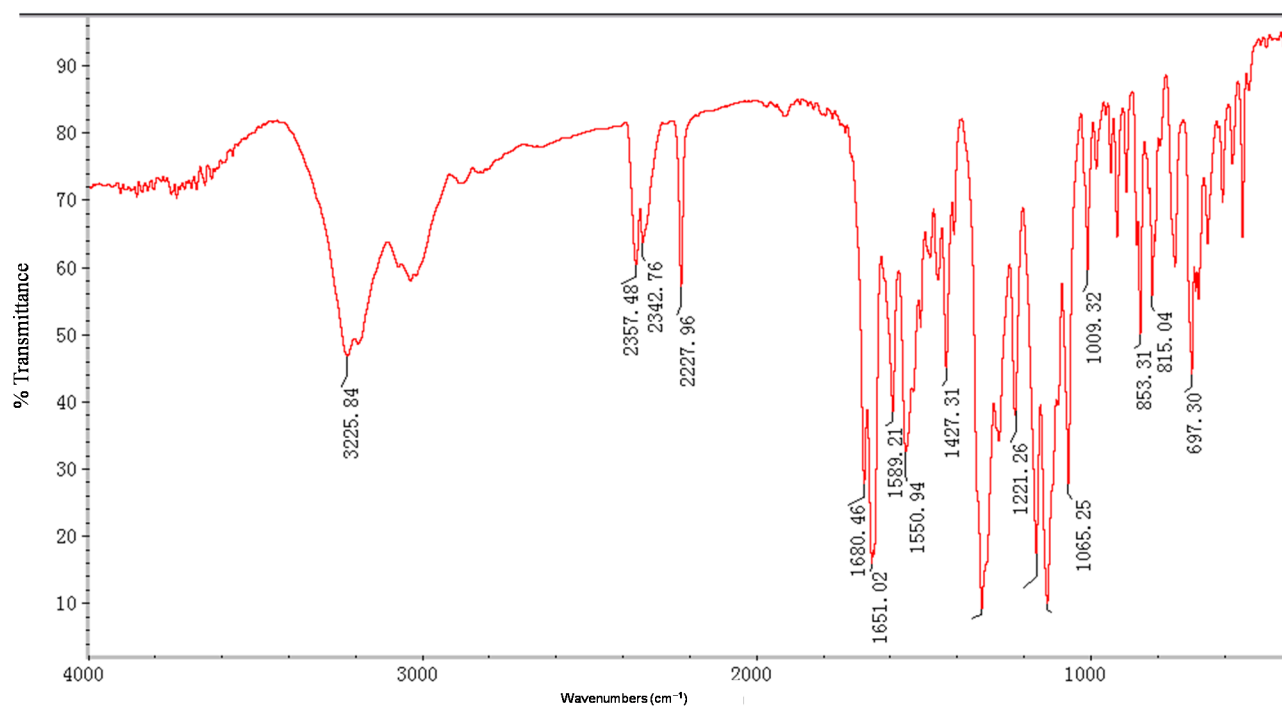

Figure S18. IR of compound 4c.



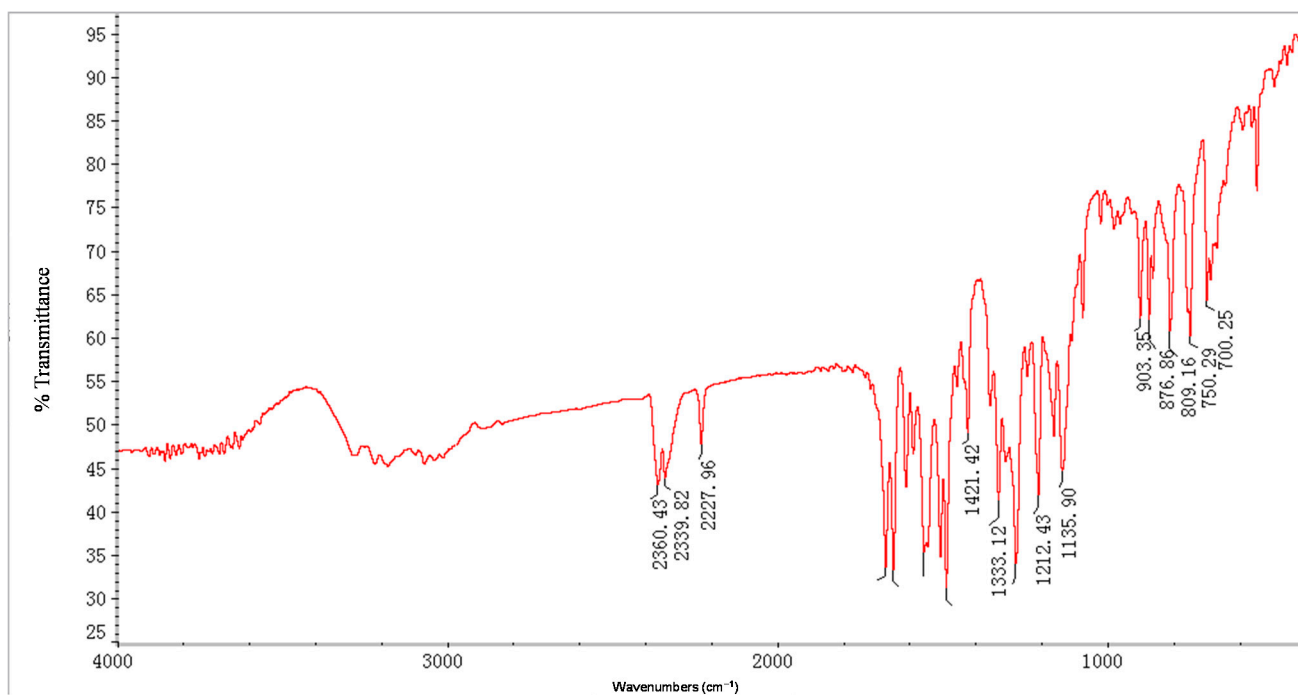

Figure S21. IR of compound 4d.

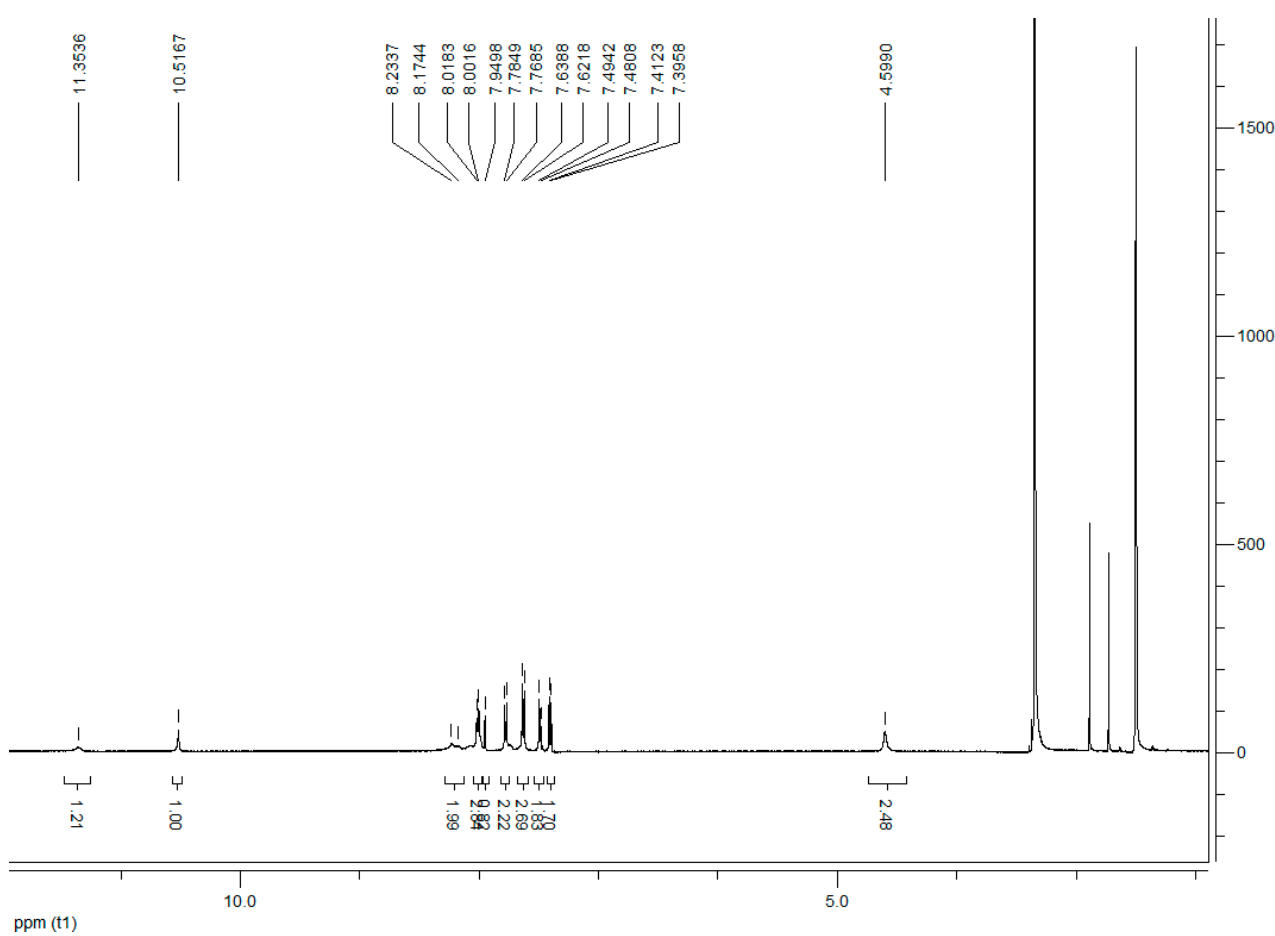

Figure S22. <sup>1</sup>H-NMR spectra of compound 4e.

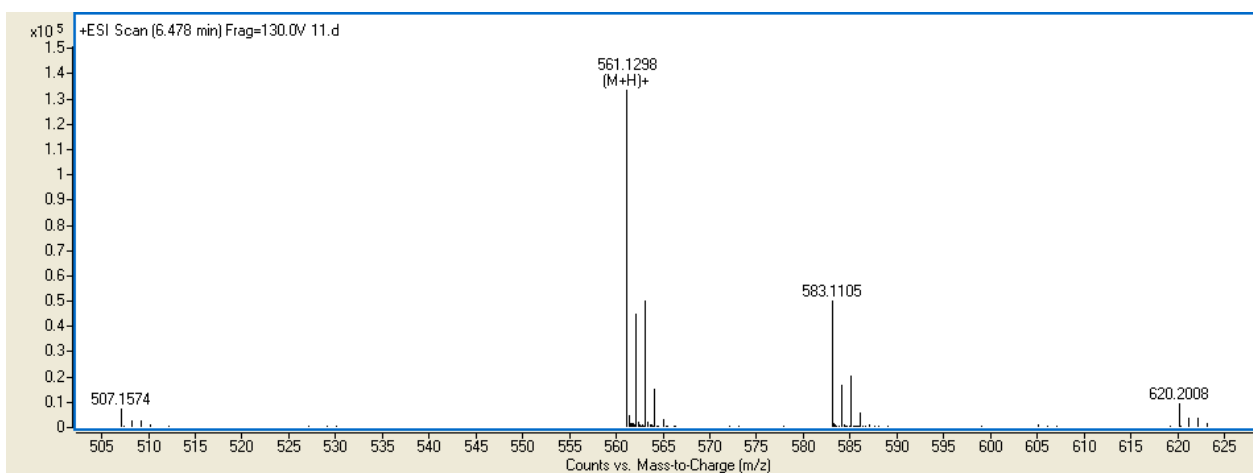

Figure S23. MS of compound 4e.

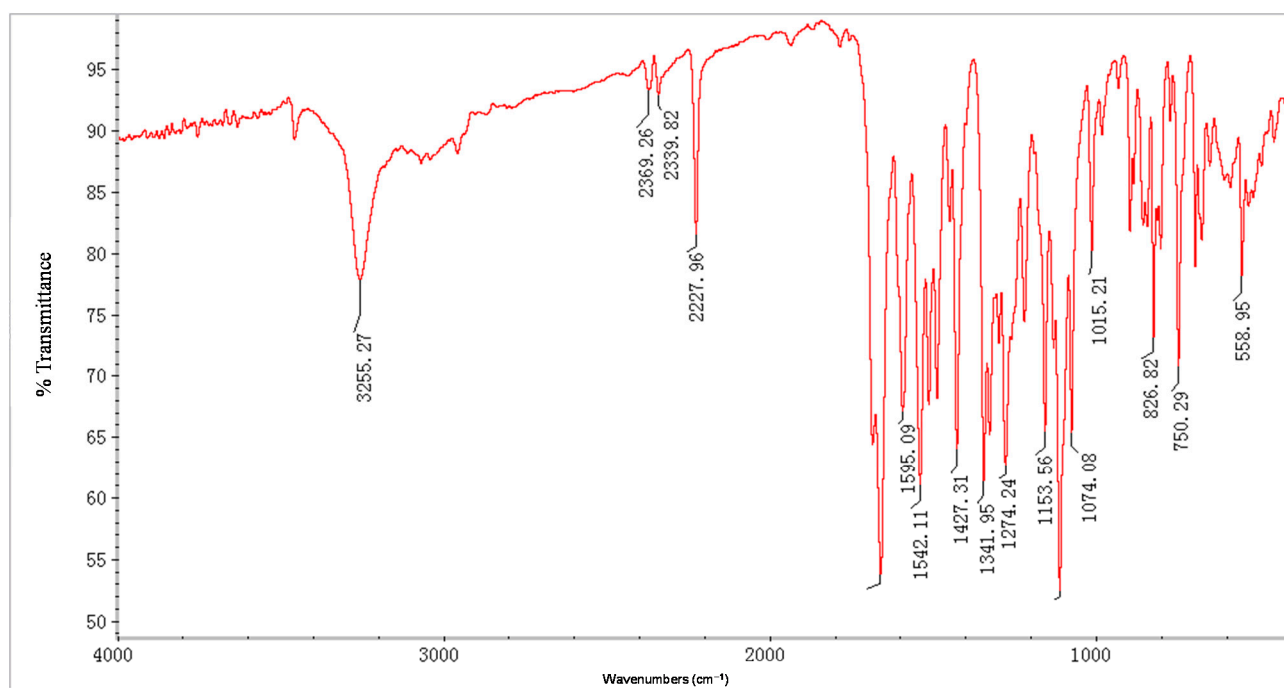

Figure S24. IR of compound 4e.

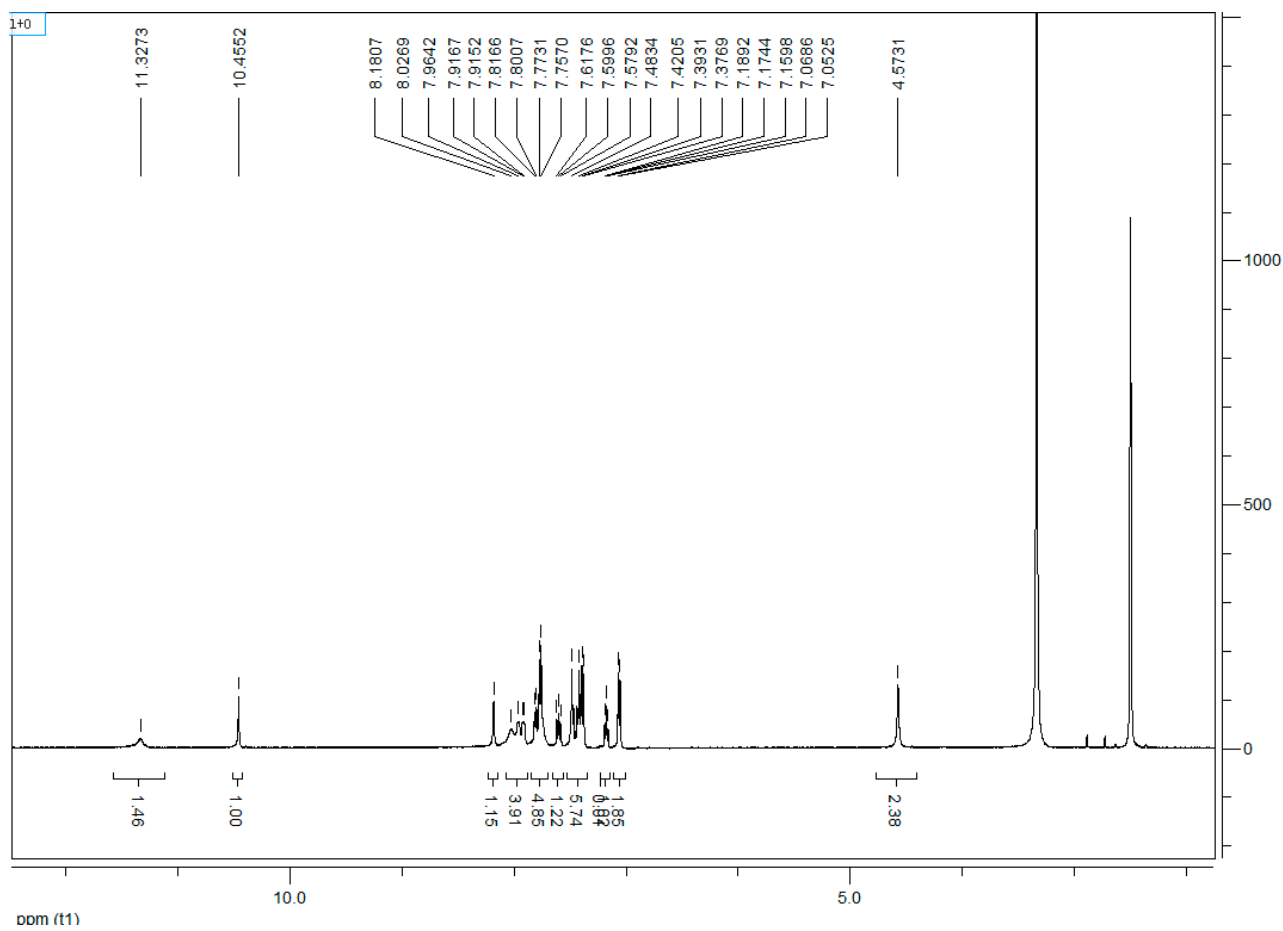

Figure S25.  $^1\text{H-NMR}$  spectra of compound **4f**.

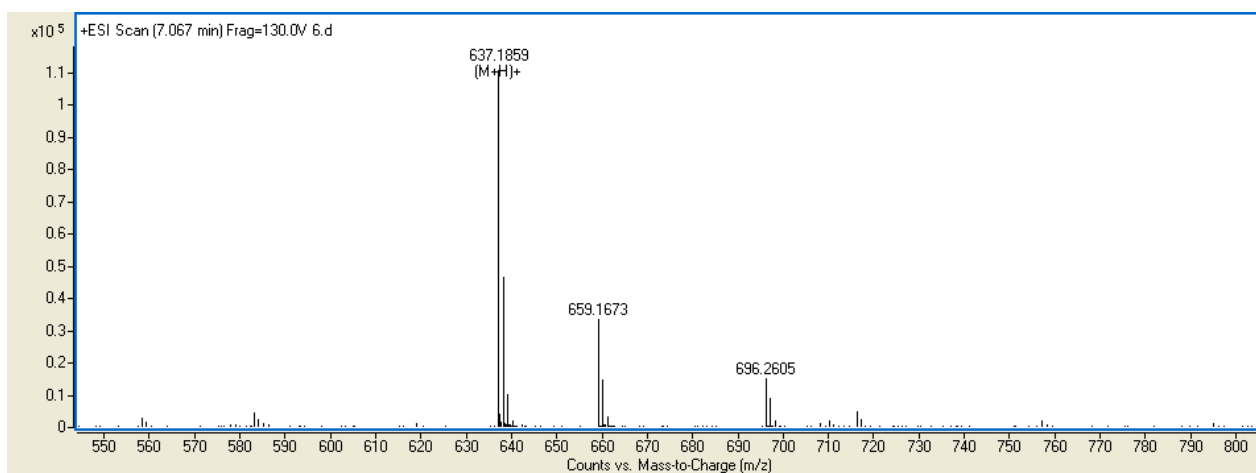

Figure S26. MS of compound **4f**.



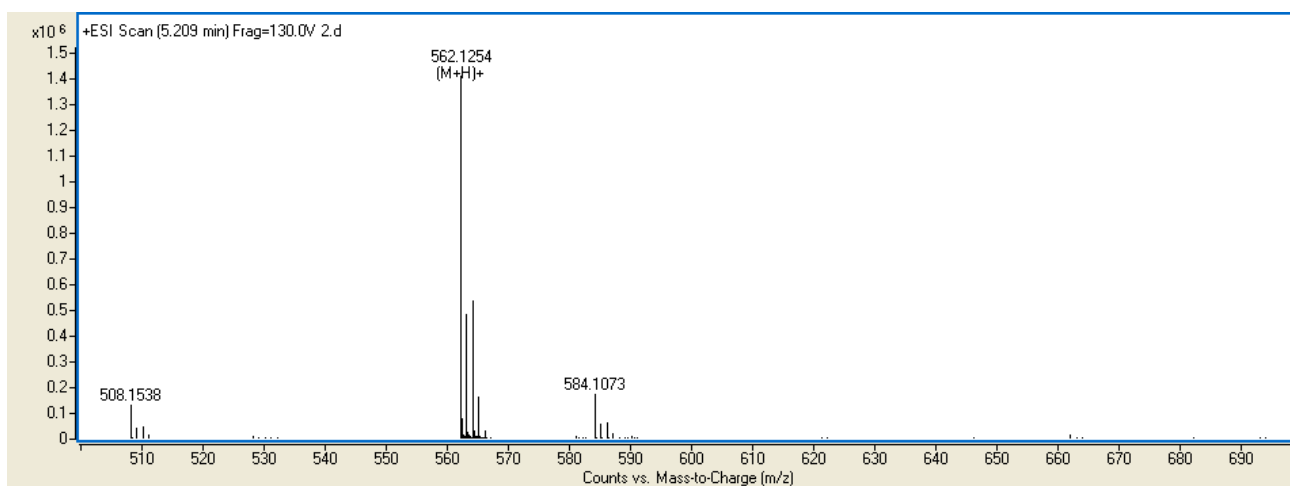

Figure S29. MS spectra of compound **4g**.

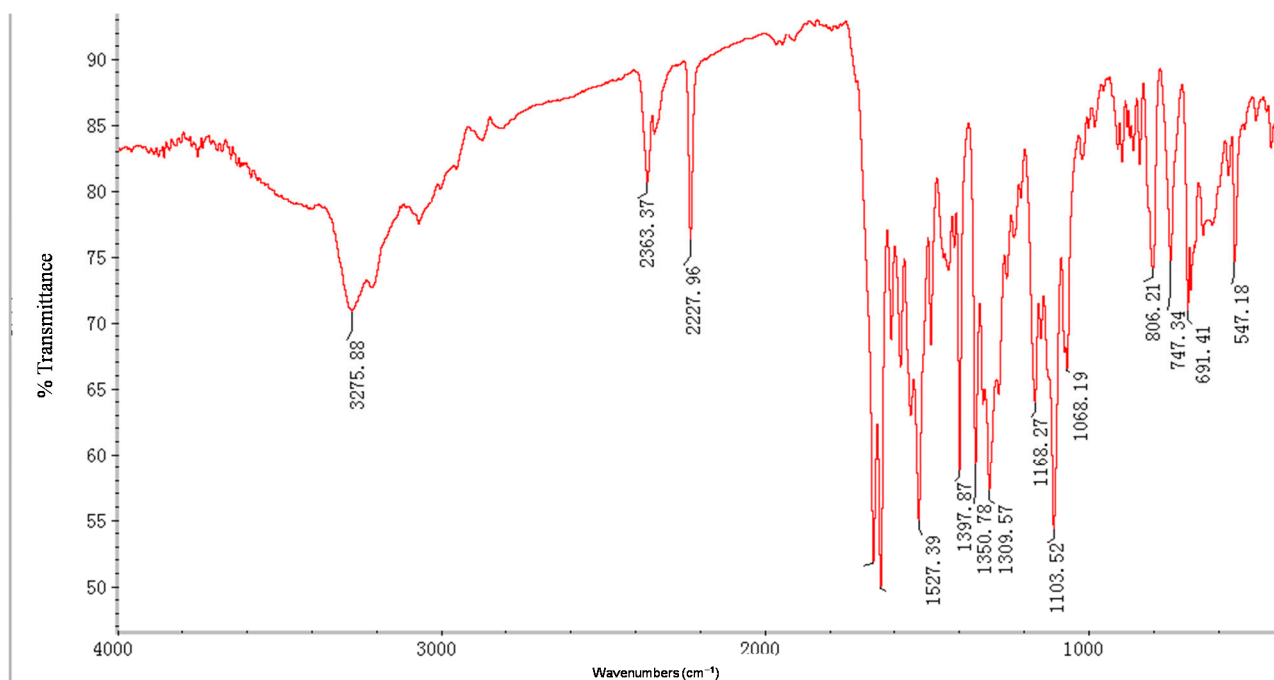

Figure S30. IR spectra of compound **4g**.

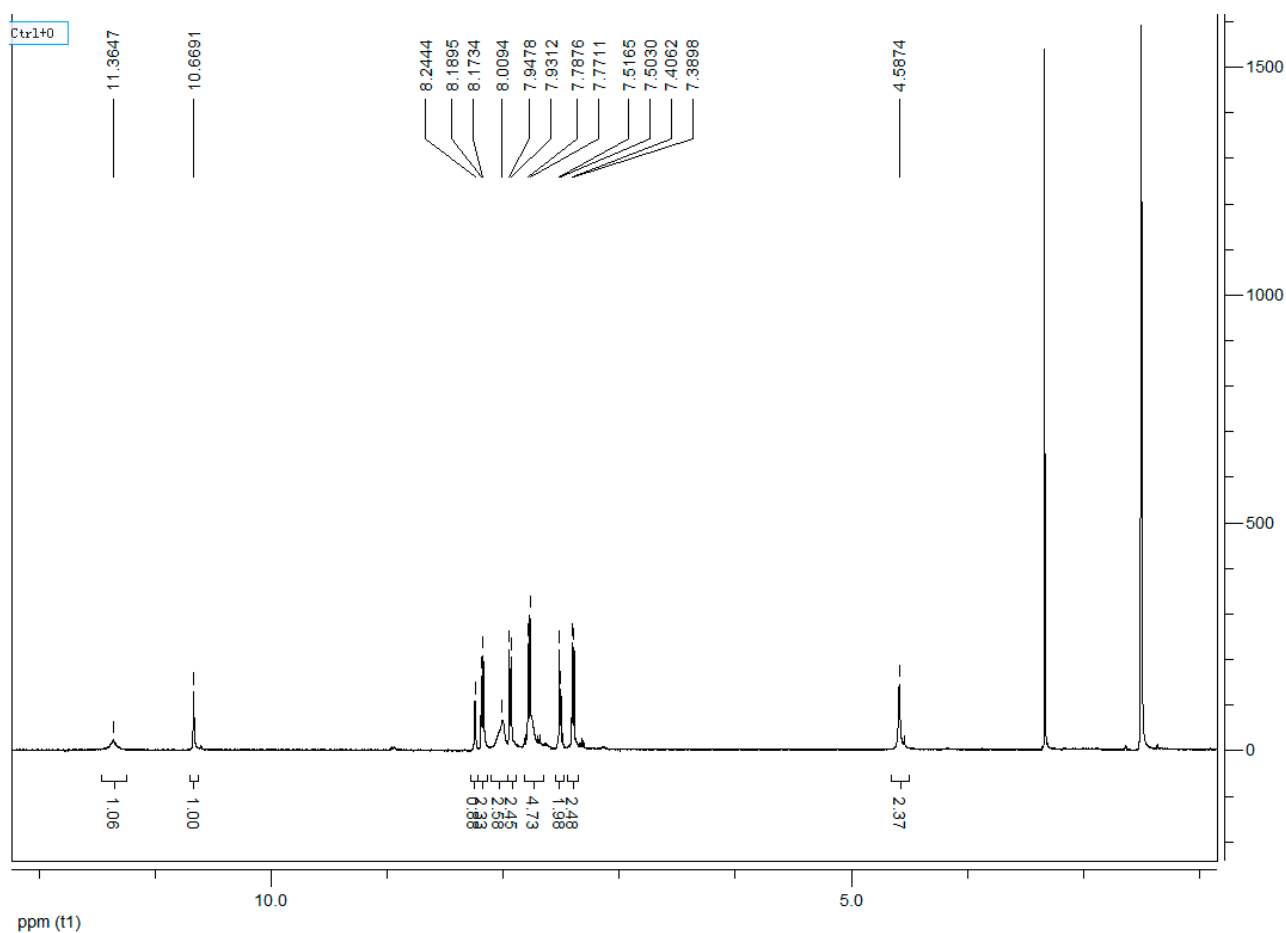

Figure S31.  $^1\text{H-NMR}$  spectra of compound **4h**.

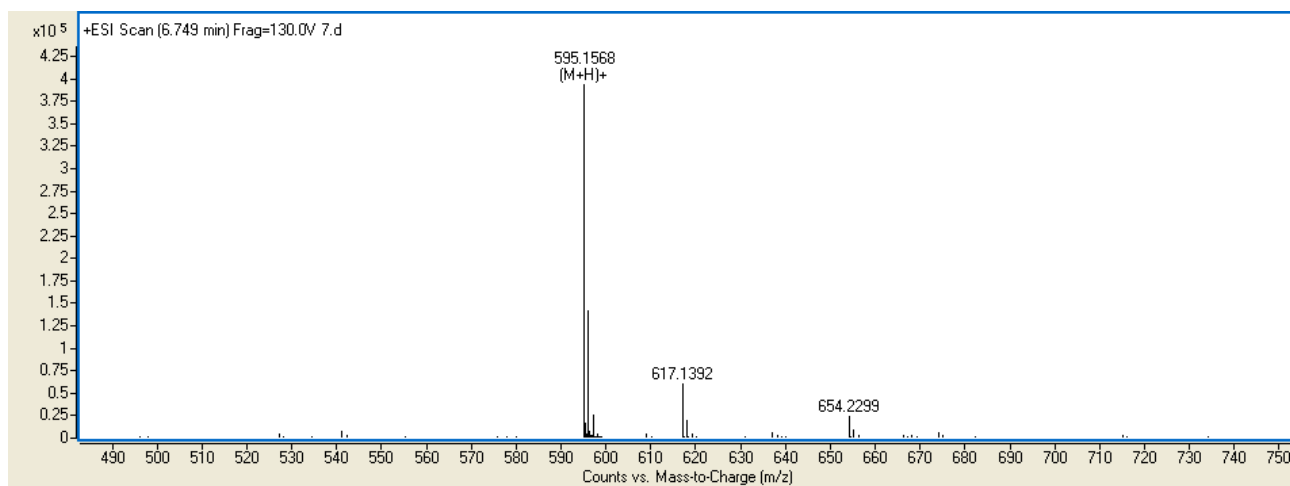

Figure S32. MS of compound **4h**.



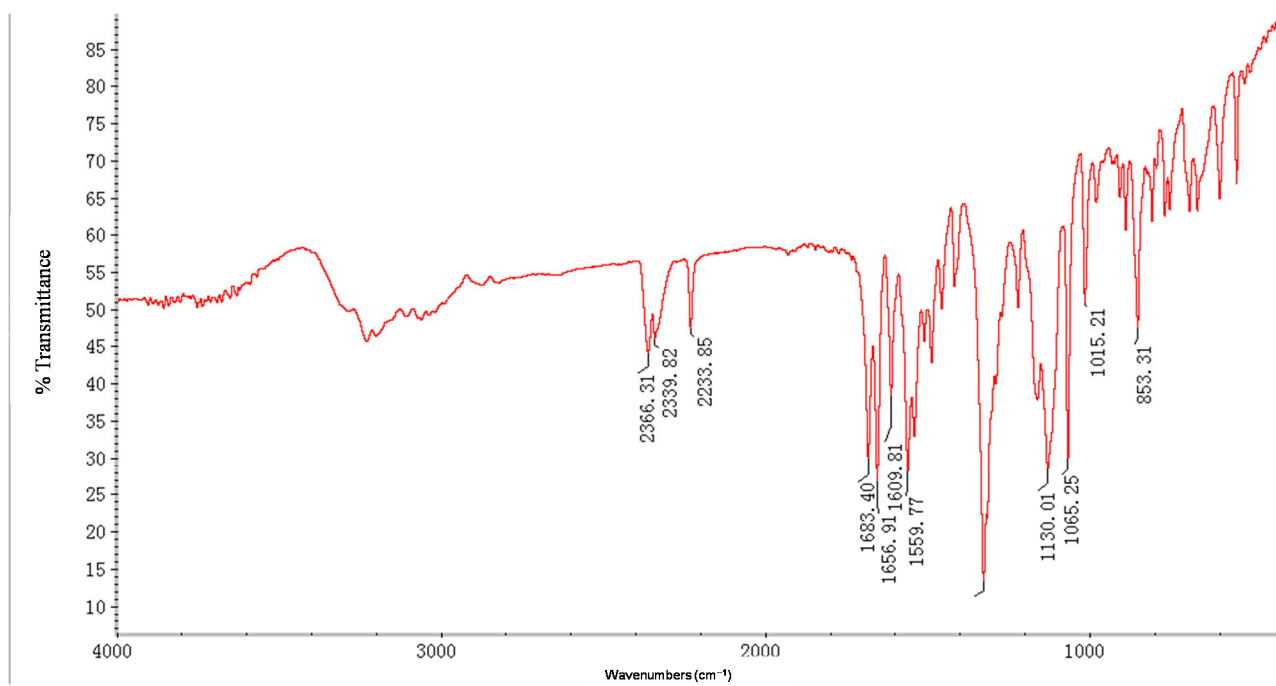

Figure S33. IR of compound 4h.

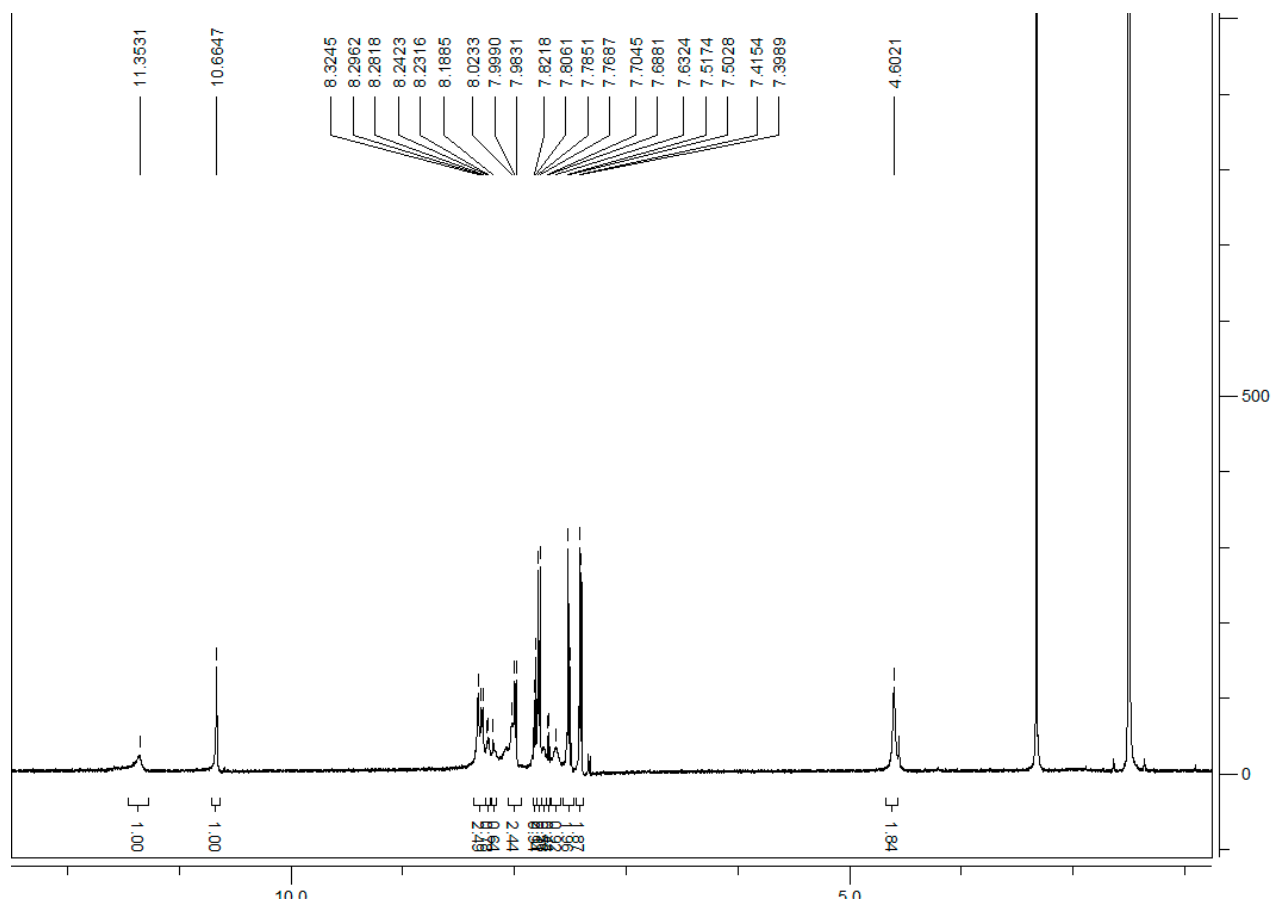Figure S34. <sup>1</sup>H-NMR spectra of compound 4i.

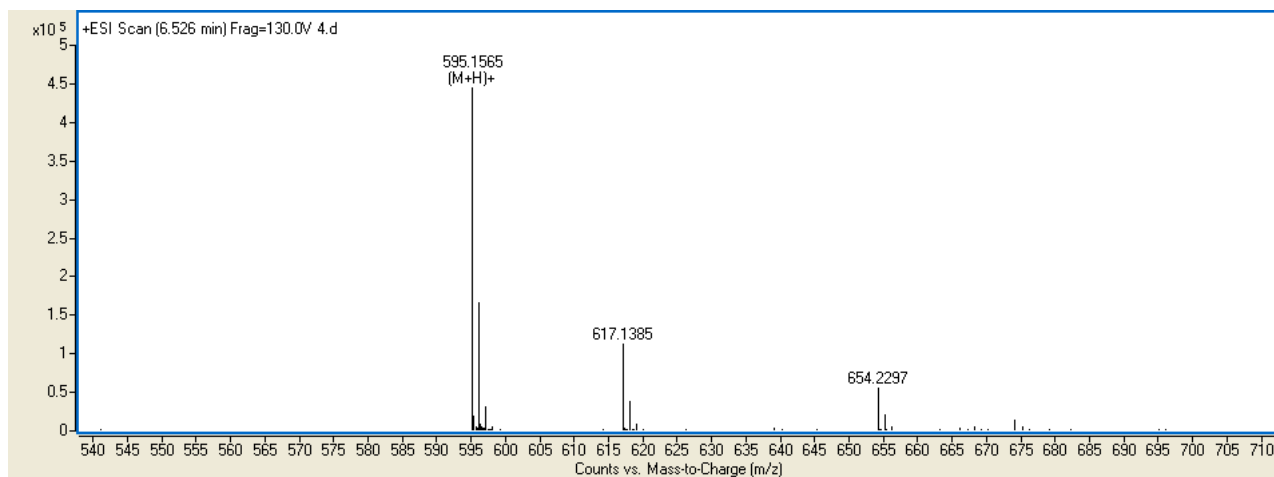

Figure S35. MS spectra of compound 4i.

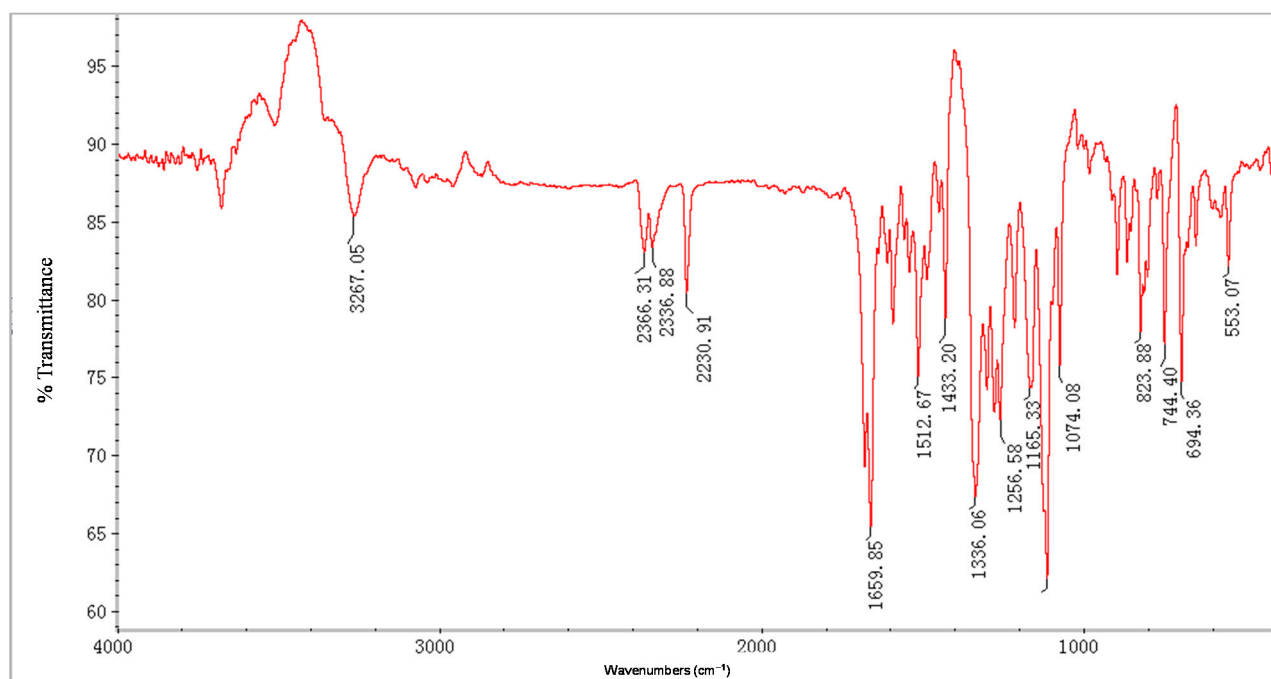

Figure S36. IR spectra of compound 4i.

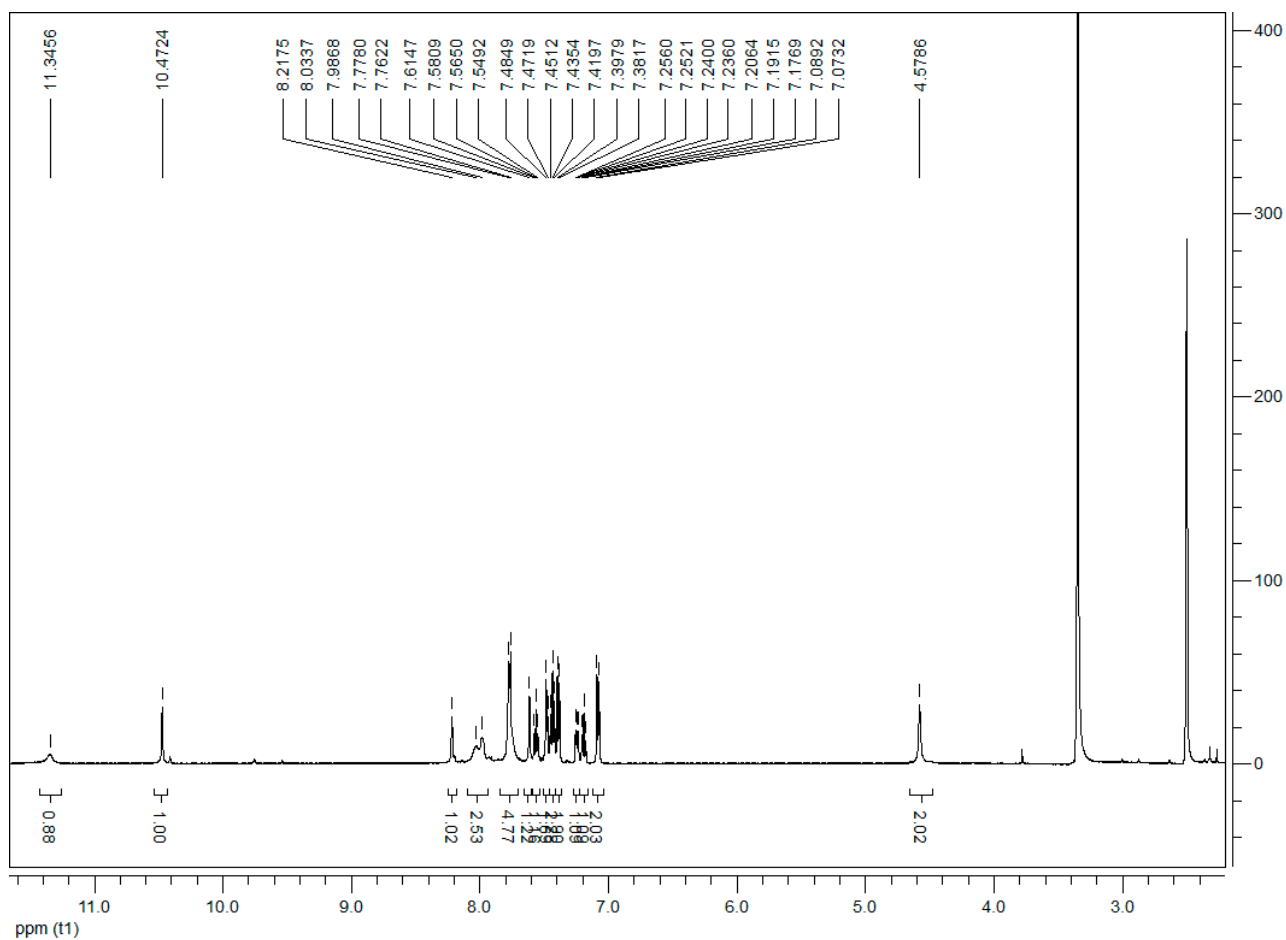

Figure S37.  $^1\text{H-NMR}$  spectra of compound **4j**.

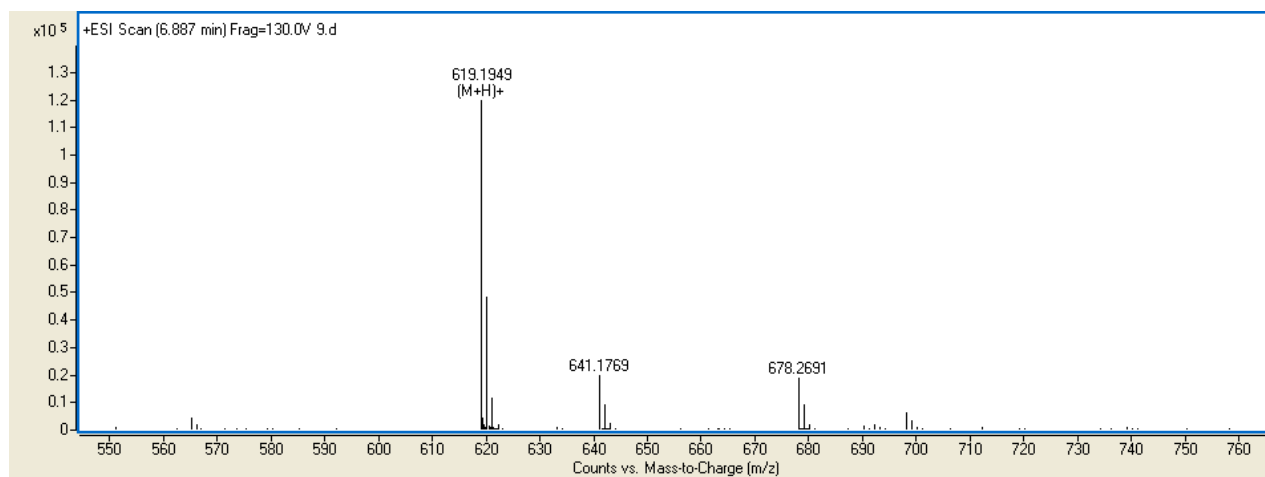

Figure S38. MS of compound **4j**.

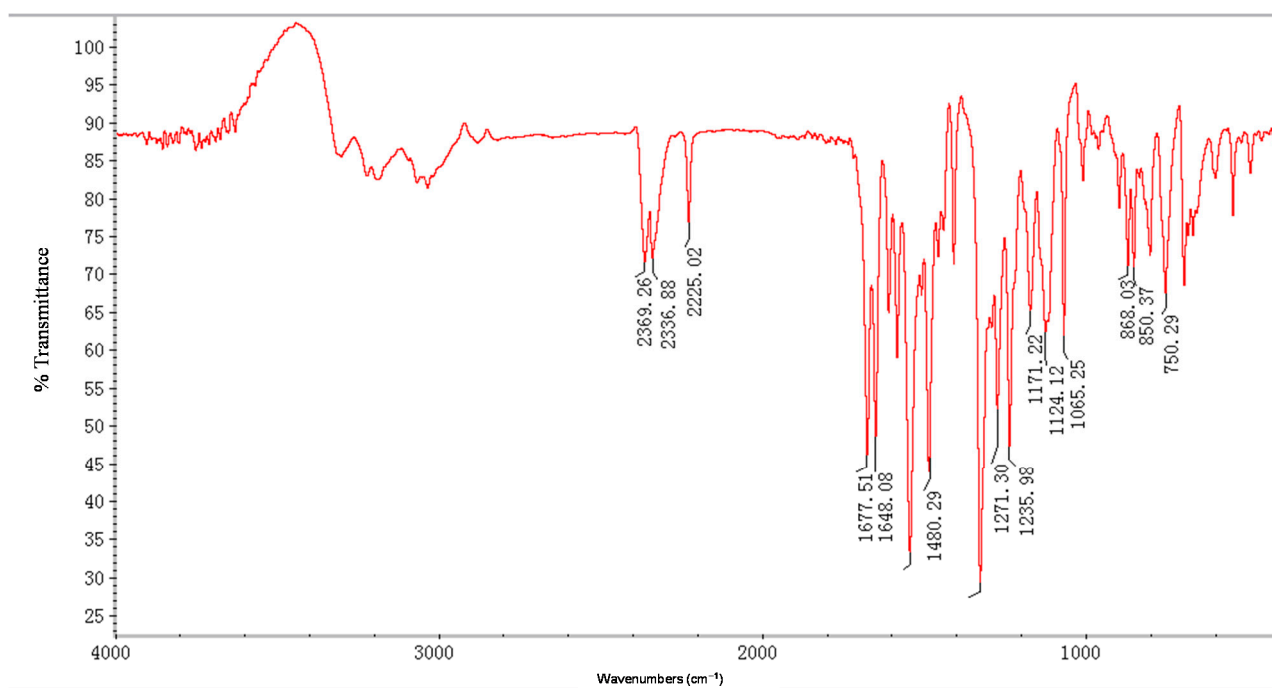

Figure S39. IR of compound 4j.

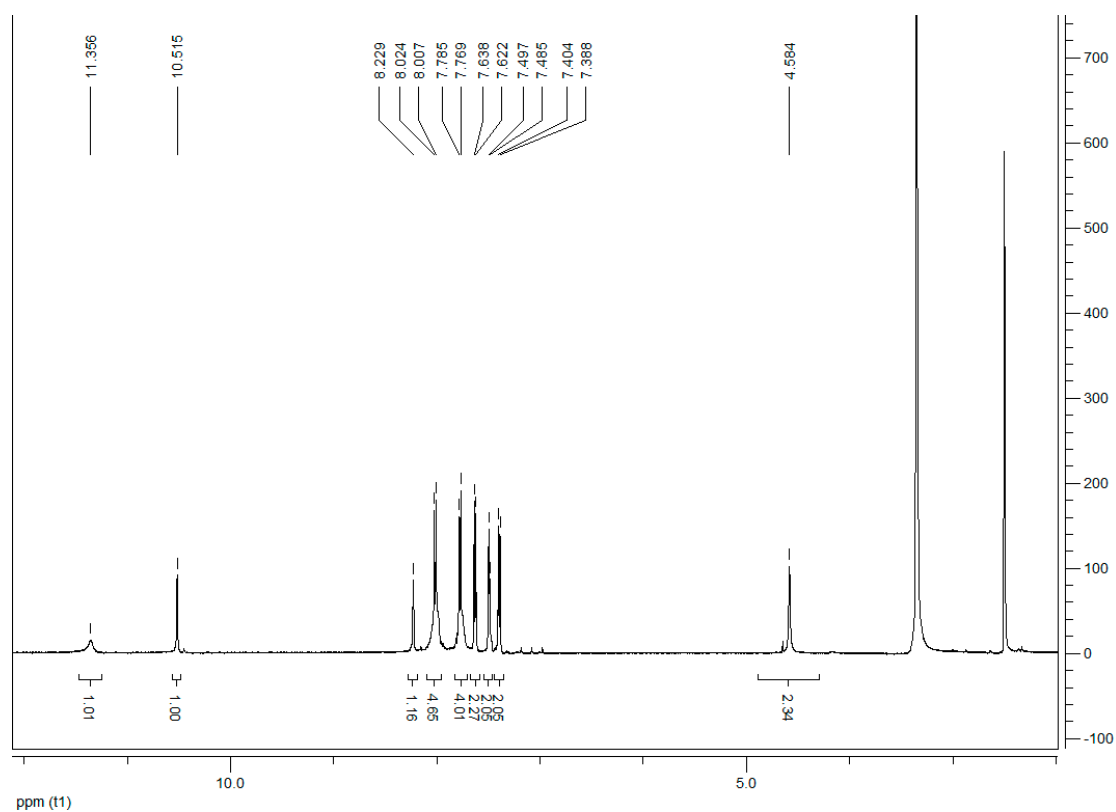Figure S40. <sup>1</sup>H-NMR spectra of compound 4k.

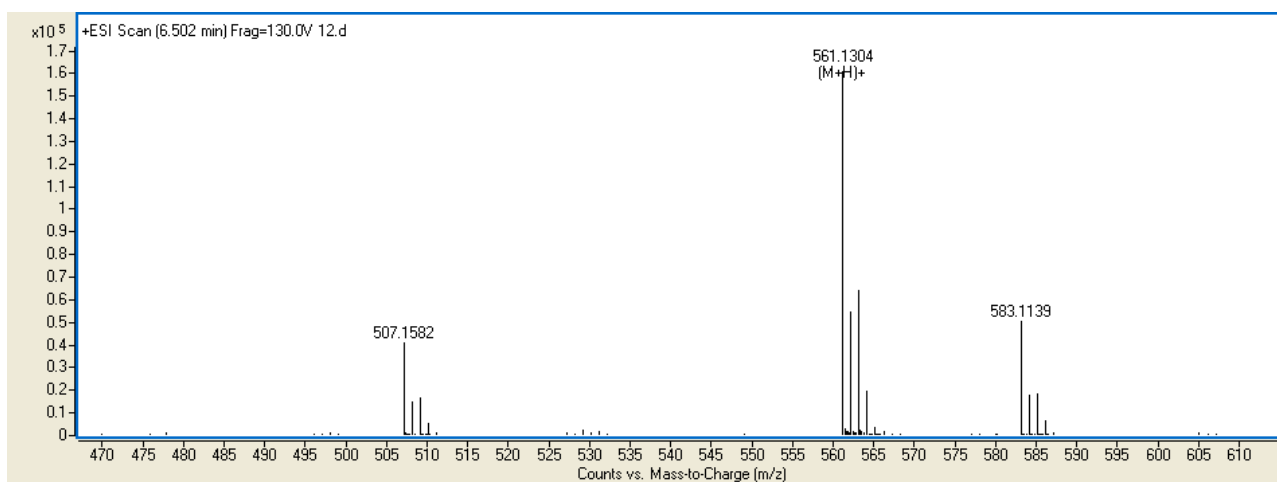

Figure S41. MS of compound 4k w201312111.

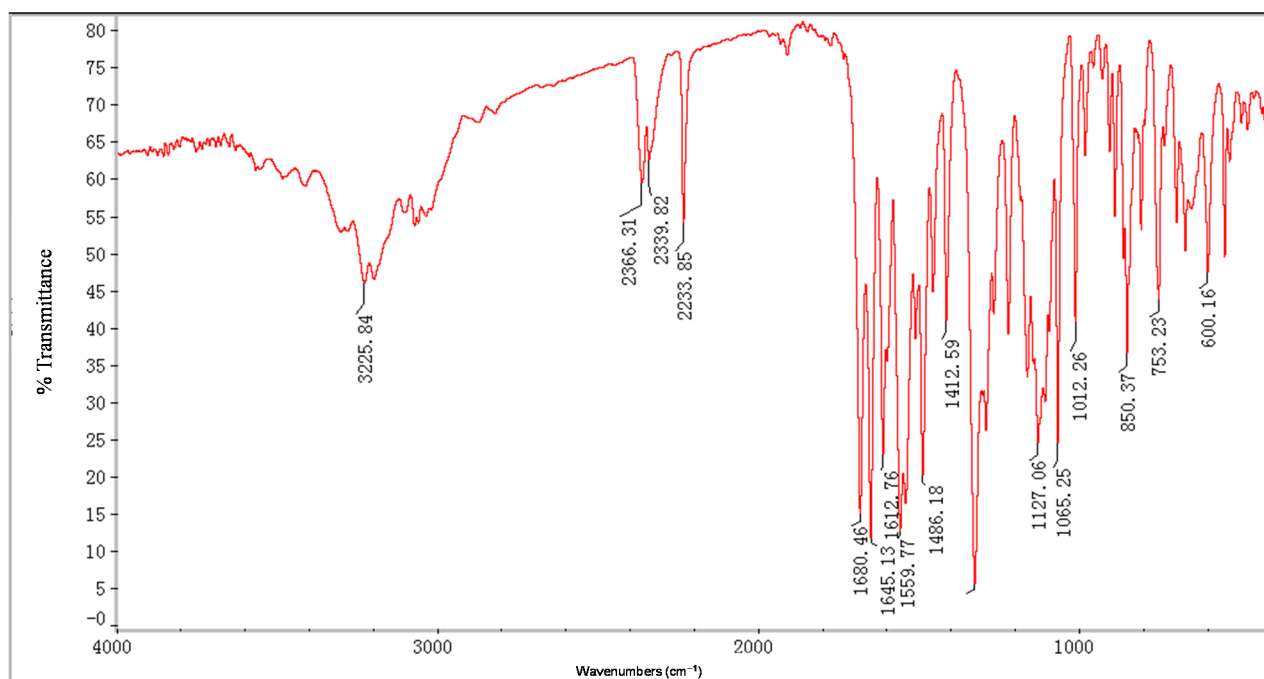

Figure S42. IR of compound 4k.

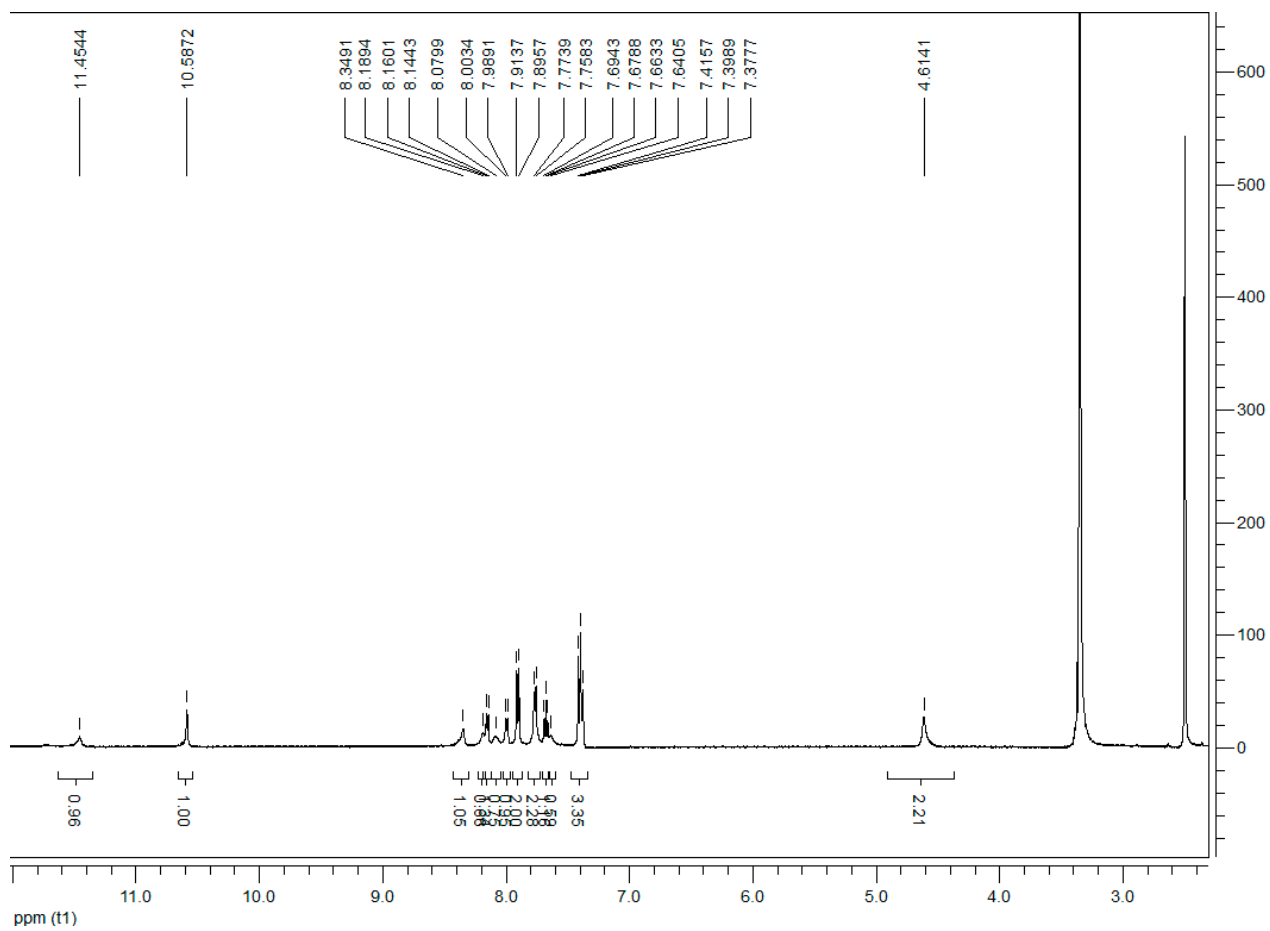

**Figure S43.  $^1\text{H-NMR}$  spectra of 4l.**

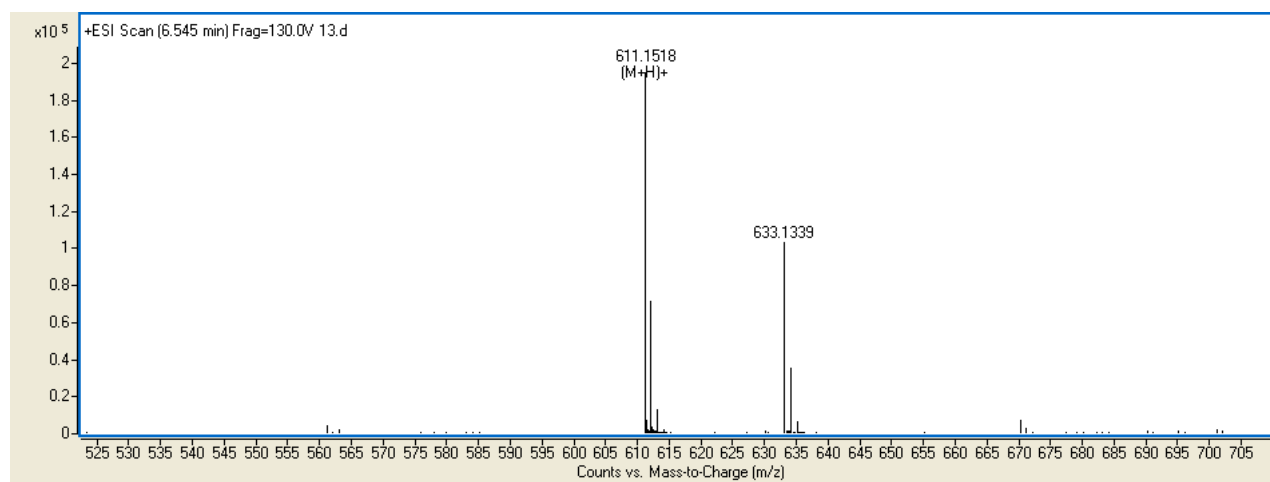

**Figure S44. MS of compound 4l.**

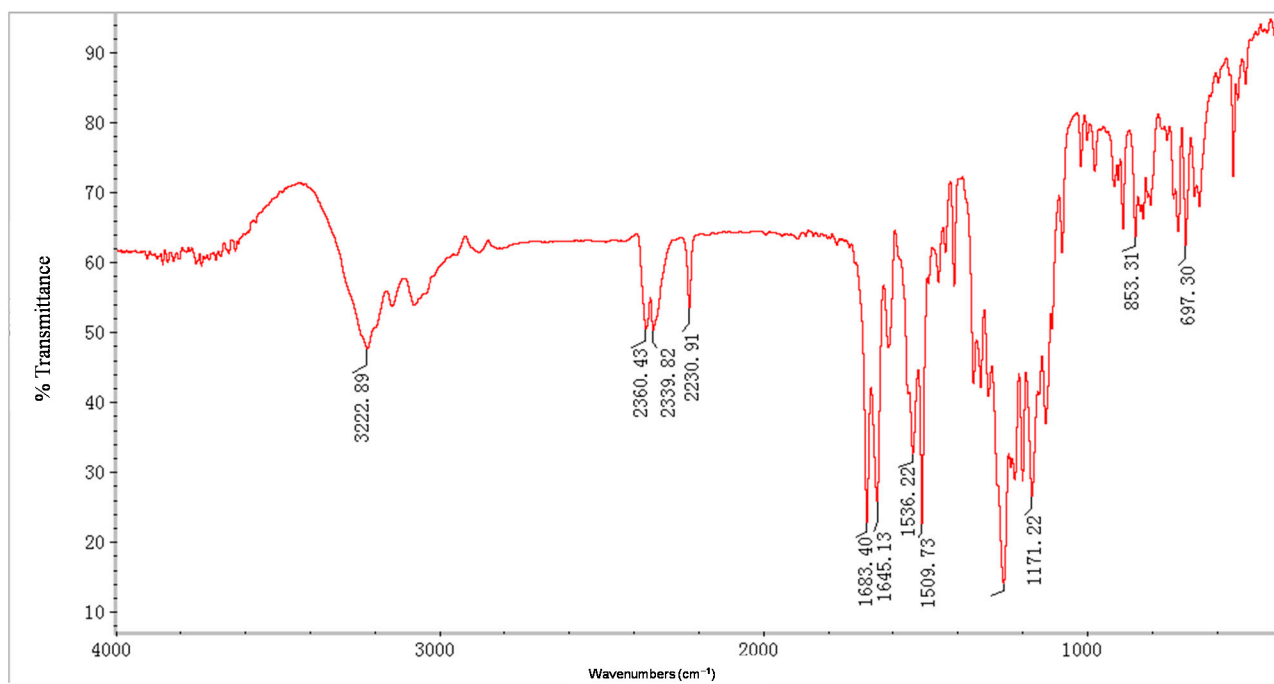

**Figure S45.** IR of compound **4I**.
